# Supplementary material for: Study protocol for the Melbourne Infant Study: BCG for Allergy and Infection Reduction (MIS BAIR), a randomised controlled trial to determine the non-specific effects of neonatal BCG vaccination in a low-mortality setting
Source: PubMed Central journal article supplement — BMJ Open. 2019 Dec 15;9(12):e032844. doi: 10.1136/bmjopen-2019-032844 (PMC6924750; doi:10.1136/bmjopen-2019-032844), 2019-12-15
Supplement: bmjopen-2019-032844.draft_revisions.pdf [file bmjopen-2019-032844.draft_revisions.pdf]

# BMJ Open

BMJ Open is committed to open peer review. As part of this commitment we make the peer review history of every article we publish publicly available.

When an article is published we post the peer reviewers' comments and the authors' responses online. We also post the versions of the paper that were used during peer review. These are the versions that the peer review comments apply to.

The versions of the paper that follow are the versions that were submitted during the peer review process. They are not the versions of record or the final published versions. They should not be cited or distributed as the published version of this manuscript.

BMJ Open is an open access journal and the full, final, typeset and author-corrected version of record of the manuscript is available on our site with no access controls, subscription charges or pay-per-view fees (<http://bmjopen.bmj.com>).

If you have any questions on BMJ Open's open peer review process please email [info.bmjopen@bmj.com](mailto:info.bmjopen@bmj.com)

# BMJ Open

## Melbourne Infant Study: BCG for Allergy and Infection Reduction (MIS BAIR) A randomised, controlled trial to determine the non-specific effects of neonatal BCG vaccination in a low-mortality setting

|                               |                                                                                                                                                                                                                                                                                                                                                                                                                                                                                                                                                                                                                                                                                                                                                                                                                                                                                                                                                                                                                                                                                                                                                                                                                                                                                                                                                                                                                                                                                                                                                                                                                                                                                                                                                                                                                                                                                                                                                                                                                                                                                                                                                                                                                                                                                     |
|-------------------------------|-------------------------------------------------------------------------------------------------------------------------------------------------------------------------------------------------------------------------------------------------------------------------------------------------------------------------------------------------------------------------------------------------------------------------------------------------------------------------------------------------------------------------------------------------------------------------------------------------------------------------------------------------------------------------------------------------------------------------------------------------------------------------------------------------------------------------------------------------------------------------------------------------------------------------------------------------------------------------------------------------------------------------------------------------------------------------------------------------------------------------------------------------------------------------------------------------------------------------------------------------------------------------------------------------------------------------------------------------------------------------------------------------------------------------------------------------------------------------------------------------------------------------------------------------------------------------------------------------------------------------------------------------------------------------------------------------------------------------------------------------------------------------------------------------------------------------------------------------------------------------------------------------------------------------------------------------------------------------------------------------------------------------------------------------------------------------------------------------------------------------------------------------------------------------------------------------------------------------------------------------------------------------------------|
| Journal:                      | <i>BMJ Open</i>                                                                                                                                                                                                                                                                                                                                                                                                                                                                                                                                                                                                                                                                                                                                                                                                                                                                                                                                                                                                                                                                                                                                                                                                                                                                                                                                                                                                                                                                                                                                                                                                                                                                                                                                                                                                                                                                                                                                                                                                                                                                                                                                                                                                                                                                     |
| Manuscript ID                 | bmjopen-2019-032844                                                                                                                                                                                                                                                                                                                                                                                                                                                                                                                                                                                                                                                                                                                                                                                                                                                                                                                                                                                                                                                                                                                                                                                                                                                                                                                                                                                                                                                                                                                                                                                                                                                                                                                                                                                                                                                                                                                                                                                                                                                                                                                                                                                                                                                                 |
| Article Type:                 | Protocol                                                                                                                                                                                                                                                                                                                                                                                                                                                                                                                                                                                                                                                                                                                                                                                                                                                                                                                                                                                                                                                                                                                                                                                                                                                                                                                                                                                                                                                                                                                                                                                                                                                                                                                                                                                                                                                                                                                                                                                                                                                                                                                                                                                                                                                                            |
| Date Submitted by the Author: | 10-Jul-2019                                                                                                                                                                                                                                                                                                                                                                                                                                                                                                                                                                                                                                                                                                                                                                                                                                                                                                                                                                                                                                                                                                                                                                                                                                                                                                                                                                                                                                                                                                                                                                                                                                                                                                                                                                                                                                                                                                                                                                                                                                                                                                                                                                                                                                                                         |
| Complete List of Authors:     | <p>Messina, Nicole; Murdoch Childrens Research Institute, Infectious Diseases; The University of Melbourne Faculty of Medicine Dentistry and Health Sciences, Department of Paediatrics</p> <p>Gardiner, Kaya; Murdoch Childrens Research Institute, Infectious Diseases</p> <p>Donath, Susan; Murdoch Childrens Research Institute, Clinical Epidemiology and Biostatistics Unit; The University of Melbourne Faculty of Medicine Dentistry and Health Sciences, Department of Paediatrics</p> <p>Flanagan, Katie; University of Tasmania, School of Health Sciences; RMIT University, School of Health and Biomedical Science</p> <p>Ponsonby, Anne-Louise; Murdoch Childrens Research Institute, Center for Food and Allergy Research; The University of Melbourne Faculty of Medicine Dentistry and Health Sciences, Department of Paediatrics</p> <p>Shann, Frank; Royal Children's Hospital Melbourne, Intensive Care Unit; The University of Melbourne Faculty of Medicine Dentistry and Health Sciences, Department of Paediatrics</p> <p>RobinsBrowne, Roy; University of Melbourne, Microbiology and Immunology; Murdoch Childrens Research Institute, Infectious Diseases</p> <p>Freyne, Bridget; Murdoch Childrens Research Institute, Infectious Diseases; The University of Melbourne Faculty of Medicine Dentistry and Health Sciences, Department of Paediatrics</p> <p>Abruzzo, Veronica; Murdoch Childrens Research Institute, Infectious Diseases</p> <p>Morison, Clare; Murdoch Childrens Research Institute, Infectious Diseases</p> <p>Cox, Lianne; Murdoch Childrens Research Institute, Infectious Diseases; The University of Melbourne Faculty of Medicine Dentistry and Health Sciences, Department of Paediatrics</p> <p>Germano, Susie; Murdoch Childrens Research Institute, Infectious Diseases</p> <p>Zufferey, Christel; Murdoch Childrens Research Institute, Infectious Diseases</p> <p>Allen, Katrina; Murdoch Childrens Research Institute, Center for Food and Allergy Research; Royal Children's Hospital Melbourne, Department of Allergy &amp; Immunology</p> <p>Vuillermin, P; Deakin University School of Medicine; Barwon Health, Child health research unit</p> <p>South, Mike; Royal Children's Hospital Melbourne, Department of</p> |

1  
2  
3  
4  
5  
6  
7  
8  
9  
10  
11  
12  
13  
14  
15  
16  
17  
18  
19  
20  
21  
22  
23  
24  
25  
26  
27  
28  
29  
30  
31  
32  
33  
34  
35  
36  
37  
38  
39  
40  
41  
42  
43  
44  
45  
46  
47  
48  
49  
50  
51  
52  
53  
54  
55  
56  
57  
58  
59  
60

|           |                                                                                                                                                                                                                                                                                                                                                                                                                               |
|-----------|-------------------------------------------------------------------------------------------------------------------------------------------------------------------------------------------------------------------------------------------------------------------------------------------------------------------------------------------------------------------------------------------------------------------------------|
|           | General Medicine; The University of Melbourne Faculty of Medicine Dentistry and Health Sciences, Department of Paediatrics<br>Casalaz, Dan; Mercy Hospital for Women, Neonatal Intensive Care Unit<br>Curtis, Nigel; Murdoch Childrens Research Institute, Infectious Diseases, Royal Children's Hospital Melbourne; The University of Melbourne Faculty of Medicine Dentistry and Health Sciences, Department of Paediatrics |
| Keywords: | Immunology < BASIC SCIENCES, Eczema < DERMATOLOGY, INFECTIOUS DISEASES, Paediatric infectious disease & immunisation < PAEDIATRICS, Asthma < THORACIC MEDICINE, Allergy < THORACIC MEDICINE                                                                                                                                                                                                                                   |
|           |                                                                                                                                                                                                                                                                                                                                                                                                                               |

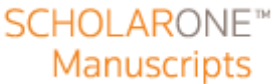

## Note from the Editors: Instructions for reviewers of study protocols

---

Since launching in 2011, BMJ Open has published study protocols for planned or ongoing research studies. If data collection is complete, we will not consider the manuscript.

Publishing study protocols enables researchers and funding bodies to stay up to date in their fields by providing exposure to research activity that may not otherwise be widely publicised. This can help prevent unnecessary duplication of work and will hopefully enable collaboration. Publishing protocols in full also makes available more information than is currently required by trial registries and increases transparency, making it easier for others (editors, reviewers and readers) to see and understand any deviations from the protocol that occur during the conduct of the study.

The scientific integrity and the credibility of the study data depend substantially on the study design and methodology, which is why the study protocol requires a thorough peer-review.

*BMJ Open* will consider for publication protocols for any study design, including observational studies and systematic reviews.

Some things to keep in mind when reviewing the study protocol:

- Protocol papers should report planned or ongoing studies. The dates of the study should be included in the manuscript.
- Unfortunately we are unable to customize the reviewer report form for study protocols. As such, some of the items (i.e., those pertaining to results) on the form should be scored as Not Applicable (N/A).
- While some baseline data can be presented, there should be no results or conclusions present in the study protocol.
- For studies that are ongoing, it is generally the case that very few changes can be made to the methodology. As such, requests for revisions are generally clarifications for the rationale or details relating to the methods. If there is a major flaw in the study that would prevent a sound interpretation of the data, we would expect the study protocol to be rejected.

1  
2  
3 **Melbourne Infant Study: BCG for Allergy and Infection Reduction (MIS BAIR) A**  
4 **randomised, controlled trial to determine the non-specific effects of neonatal BCG**  
5 **vaccination in a low-mortality setting**  
6

7  
8 \*Dr Nicole L Messina<sup>1,2</sup>, \*Ms Kaya Gardiner<sup>1</sup>, A/Prof Susan Donath<sup>1,2</sup>, Dr Katie  
9 Flanagan<sup>3,4,5</sup>, Dr Anne-Louise Ponsonby<sup>1,2</sup>, Prof Frank Shann<sup>2</sup>, Prof Roy Robins-Browne<sup>1,2</sup>,  
10 Dr Bridget Freyne<sup>1,2</sup>, Ms Veronica Abruzzo<sup>1</sup>, Ms Clare Morison<sup>1</sup>, Dr Lianne Cox<sup>1,2</sup>, Ms Susie  
11 Germano<sup>1</sup>, Dr Christel Zufferey<sup>1</sup>, Prof Katrina J Allen<sup>1,2,7</sup>, Prof Peter Vuillermin<sup>1,8,9,10</sup>, Prof  
12 Mike South<sup>2,7</sup>, Dr Dan Caslaz<sup>6</sup>, Prof Nigel Curtis<sup>1,2,7¶</sup>  
13  
14

15 **Author affiliations**

16 <sup>1</sup> Infectious Diseases, Clinical Epidemiology & Biostatistics Unit, Centre for Food and  
17 Allergy Research, Murdoch Children's Research Institute, Parkville, Victoria, Australia

18 <sup>2</sup> Departments of Paediatrics and Microbiology & Immunology, The University of  
19 Melbourne, Parkville, Victoria, Australia

20 <sup>3</sup> School of Health Sciences, University of Tasmania, Launceston, Tasmania, Australia

21 <sup>4</sup> School of Health and Biomedical Science, RMIT University, Melbourne, Victoria, Australia

22 <sup>5</sup> Department of Immunology and Pathology, Monash University, Melbourne, Victoria,  
23 Australia

24 <sup>6</sup> Neonatal Intensive Care Unit, Mercy Hospital for Women, Heidelberg, Victoria, Australia

25 <sup>7</sup> Infection Diseases Unit and Departments of Allergy & Immunology and General Medicine,  
26 The Royal Children's Hospital, Parkville, Victoria, Australia

27 <sup>8</sup> School of Medicine, Deakin University, Geelong, Victoria, Australia

28 <sup>9</sup> Child health research unit, Barwon Health, Geelong, Victoria, Australia

29 <sup>10</sup> St John of God Hospital, Geelong, Victoria, Australia.  
30  
31  
32

33  
34 \* Joint first author

35  
36 ¶ Corresponding author: Prof Nigel Curtis, Departments of Paediatrics, The University of  
37 Melbourne, The Royal Children's Hospital, Parkville, Victoria, Australia

38 [nigel.curtis@rch.org.au](mailto:nigel.curtis@rch.org.au)  
39  
40  
41  
42  
43  
44  
45  
46  
47  
48  
49  
50  
51  
52  
53  
54  
55  
56  
57  
58  
59  
60

## ABSTRACT

**Introduction** Bacillus Calmette-Guérin (BCG) vaccination reduces all-cause infant mortality in high-mortality settings by more than can be attributed to protection against tuberculosis. This is proposed to result from non-specific protection against non-vaccine targeted ('off-target') infections. There is also evidence that BCG protects against allergic diseases.

**Methods** The Melbourne Infant Study: BCG for Allergy and Infection Reduction (MIS BAIR) is a phase III multicentre, single-blinded, randomised controlled trial. A total of 1438 healthy neonates will be randomised to receive either BCG vaccination or no BCG vaccination in the first 10 days of life. Measures of allergy, eczema, infection, and asthma will be obtained from parent-completed questionnaires 3 monthly in the first year and 6-monthly from one to five years of age, and clinical assessments at one and five years of age. Biological samples will also be collected for future immunological studies.

**Analysis** Primary outcome: The proportion of participants with measures of allergy and infection (atopic sensitisation, eczema, lower respiratory tract infection) at one and five years of age, and asthma at five years of age. Secondary outcomes: (1) the proportion of participants with additional measures of allergy, eczema, asthma and infections; (2) medication use for eczema and asthma; (3) the severity and age of onset of eczema and asthma; (4) the number of episodes of infection; (5) hospitalisations for infections; and (6) laboratory measures of immune responses.

**Ethics and dissemination** This trial has ethical and governance approval from Mercy Health Human Research Ethics Committee (HREC, No. R12-28) and Royal Children's Hospital HREC (No. 33025) with additional governance approval from Barwon Health and St John of God, Geelong, Victoria. Results of this trial will be published in peer-reviewed journals and presented at scientific conferences.

*Trial Registration number:* Clinical trials.gov NCT01906853

## ARTICLE SUMMARY

### Strengths and limitations of this study

- Infections remain a leading cause of mortality in infants and allergic diseases and asthma are increasing causes of infant/child morbidity
- Large-scale randomised trials for non-specific beneficial effects of neonatal BCG vaccination in high-income countries are lacking
- Neonatal BCG vaccination could be a safe and low-cost means to improve infant health
- No placebo was given to the control group because the development of a scar in BCG vaccinated infants prevents the blinding of parents to infants' randomisation group.
- BCG was followed by multiple administrations of non-live vaccines, and this might attenuate the beneficial non-specific effects of BCG

## INTRODUCTION

The Bacillus Calmette-Guérin (BCG) vaccine is given to more than 85 percent of infants worldwide to protect against tuberculosis (TB).<sup>1</sup> In addition to protecting against TB, vaccination with BCG-Denmark reduces all-cause neonatal mortality in a high-mortality setting,<sup>2-4</sup> likely by protecting against non-mycobacterial infections.<sup>4,5</sup>

Observational studies suggest that the beneficial ‘non-specific’ (heterologous) effects of BCG on the developing immune system may also reduce the prevalence of allergic disease and asthma in children.<sup>6</sup> However, meta-analyses of observational studies have had inconsistent findings.<sup>7-9</sup> The two randomised controlled trials (RCTs) that have investigated the effect of BCG on infant allergic disease both found that BCG vaccination reduced infant eczema (medication for eczema at 18 months of age;<sup>10</sup> clinically diagnosed eczema at 13 months of age<sup>11</sup>) but did not have a statistically significant effect on the prevalence of allergic sensitisation or food allergy at 13 or 18 months of age. However, in these studies, allergic outcomes were determined by parent questionnaire and serum IgE, rather than clinical assessment. Studies assessing the impact of BCG vaccination on asthma have had more consistent findings with two meta-analyses concluding the BCG reduces the risk of asthma by 14-27%.<sup>7,9</sup>

As a result of a reduction in the prevalence of TB in several high- and middle-income countries, BCG has been removed from routine vaccination schedules. This might have contributed to the increased prevalence of allergic diseases over the past three decades.<sup>12-16</sup> It is proposed that, by acting as an early life microbial stimulus,<sup>17</sup> BCG prevents allergy by skewing the developing immune system in predisposed individuals away from the T helper (Th) 2 type immune response typically associated with allergy.<sup>6,8</sup>

BCG vaccination induces potent Th1 responses in neonates. In adults, it induces trained immunity in innate immune cells<sup>18,19</sup> and promotes Th1 and Th17 responses to non-mycobacterial pathogens.<sup>20-22</sup>

Two large observational studies provide further evidence that BCG vaccination protects against non-mycobacterial infections, particularly sepsis and respiratory infections.<sup>23,24</sup> However, BCG-mediated protection against these non-vaccine targeted or ‘off-target’ infections might be limited by subsequent vaccination with non-live vaccines which are proposed to counteract the beneficial non-specific effects of BCG.<sup>4,25,26</sup> Studies in a low-mortality setting, including a recent RCT of neonatal BCG vaccination,<sup>27</sup> and an observational study of over 19,000 infants,<sup>28</sup> support this hypothesis with protective effects of BCG against off-target infections most evident in early infancy, before administration of non-live vaccines.<sup>29</sup> Moreover, in the RCT, the protective effect of BCG was only evident in infants of BCG-vaccinated mothers.<sup>27</sup>

Subsequent to a 2004 WHO recommendation, an increasing number of countries have implemented routine neonatal hepatitis B vaccination.<sup>30</sup> Therefore, the potential impact of this vaccine on the beneficial non-specific effects of neonatal BCG vaccination also requires consideration.

Australia, where routine BCG vaccination was halted in the 1980s - has one of the highest rates of infant allergic disease globally.<sup>31-33</sup> It therefore represents an ideal setting in which to assess the impact of BCG on allergic disease. The Melbourne Infant Study: BCG for Allergy

and Infection Reduction (MIS BAIR) is an RCT to investigate whether neonatal BCG vaccination reduces the prevalence of allergic and infectious disease.

## STUDY AIMS

### Primary aims

To determine whether neonatal BCG vaccination compared with no BCG vaccination, reduces allergic disease, infection and asthma in infants and children in Australia.

### Secondary aims

To evaluate the immunological mechanisms underlying the non-specific effects of BCG by comparing the immune responses in BCG-vaccinated to those in BCG-naïve infants.

## METHODS AND ANALYSIS

### Study design and setting

This is a phase III multicentre, single-blinded, RCT of neonatal BCG vaccination compared with no BCG vaccination. Clinical trials.gov NCT01906853. (Recruitment status: completed).

The study population will be healthy neonates 0 to 10 days of age born at one of the study site hospitals in Victoria, Australia. Recent studies of the burden of allergic diseases in this population have reported high a prevalence of eczema (28%<sup>34</sup>), allergic sensitisation (18%) and clinically significant food allergy (10.4%<sup>35</sup>) at 12 months of age, as well as high rates (22%) of asthma by 4-5 years.<sup>36</sup>

Study sites comprise: the Murdoch Children's Research Institute (MCRI), Melbourne; Royal Children's Hospital (RCH) Melbourne; Mercy Hospital for Women, Heidelberg; Werribee Mercy Hospital, Werribee; University Hospital Geelong, Geelong; and St John of God Geelong Hospital, Geelong.

### Patient and Public Involvement

Patients and public were not involved in the design of this study. The results of this study will be disseminated to study participants via participant newsletter.

### Eligibility criteria

The inclusion criteria comprise: healthy neonates up to 10 days of age; birth weight greater than 1500 grams; gestational age equal to or greater than 32 weeks, mothers testing HIV negative during pregnancy, English-speaking mother and parent/legal guardian able to complete questionnaires in English and attend study visit. The exclusion criteria comprise: any indication for BCG vaccination in the first year of life as per the Australian national guidelines<sup>37</sup>; known or suspected HIV infection; infant at risk of immunodeficiency; serious underlying illness (including fever) or medical instability; skin infection or other skin condition; need for treatment with hepatitis B immunoglobulin; multiple-birth of more than twins; older sibling in the study.

### Intervention

Infants will be randomised to receive BCG vaccination or no BCG vaccination in the first 10 days of life. Infants randomised to the BCG vaccination group will be administered a single



intradermal injection of 0.05 mL *Mycobacterium bovis* BCG vaccine, Danish Strain 1331(1-4 x 10<sup>5</sup> colony forming units) over the left deltoid within 24 hours of randomisation.

### Reasons for withdrawal

Reasons for withdrawal from the study will be recorded along with demographic data. These may include: protocol violations; indication for participant to receive BCG vaccine within the first year of life;<sup>37</sup> serious adverse event (SAE) or other adverse event (AE); or guardian/parent request.

### Data and sample collection

Timing of data and sample collection in MIS BAIR is summarised in Table 1. Web-based questionnaires will be administered to parents at the time of recruitment, randomisation and when the participant is 3, 6, 9 and 12 months of age as well as 6-monthly up to 5 years of age using the Research Electronic Data Capture (REDCap) platform.<sup>38</sup> Infant perinatal data, including infections, medications and hospital admission will be obtained from the birth site records. Participants will be invited to optional study visits for biological sample collection 7 days ( $\pm$  4 days) after randomisation and at 6 months (5-8 months) of age. Infants will be invited for clinical assessment and biological sample collection at 1 year (between 11 and 24 months) and 5 years (between 5 and 6 years) of age.

Table 1: Data and sample collection schedule

| Infant age                             | Antenatal | 0-10d          | 3m | 6m             | 9m | 1y             | 1.5y | 2y | 2.5y | 3y | 3.5y | 4y | 4.5y | 5y             |
|----------------------------------------|-----------|----------------|----|----------------|----|----------------|------|----|------|----|------|----|------|----------------|
| <b>Recruitment &amp; randomisation</b> |           |                |    |                |    |                |      |    |      |    |      |    |      |                |
| Eligibility check and consent          | ✓         | ✓              |    |                |    |                |      |    |      |    |      |    |      |                |
| Baseline questionnaire                 | ✓         | ✓              |    |                |    |                |      |    |      |    |      |    |      |                |
| Birth questionnaire                    |           | ✓              |    |                |    |                |      |    |      |    |      |    |      |                |
| Randomisation $\pm$ vaccination        |           | ✓              |    |                |    |                |      |    |      |    |      |    |      |                |
| Full blood examination                 |           | ✓ <sup>a</sup> |    |                |    |                |      |    |      |    |      |    |      |                |
| <b>Post randomisation</b>              |           |                |    |                |    |                |      |    |      |    |      |    |      |                |
| Perinatal hospital data                |           | ✓              |    |                |    |                |      |    |      |    |      |    |      |                |
| Parent questionnaire                   |           |                | ✓  | ✓              | ✓  | ✓              | ✓    | ✓  | ✓    | ✓  | ✓    | ✓  | ✓    | ✓              |
| Clinical eczema assessment             |           |                |    |                |    | ✓              |      |    |      |    |      |    |      | ✓              |
| Skin prick test                        |           |                |    |                |    | ✓              |      |    |      |    |      |    |      | ✓              |
| Oral food challenge                    |           |                |    |                |    | ✓ <sup>b</sup> |      |    |      |    |      |    |      | ✓ <sup>b</sup> |
| Biological sample collection           |           | ✓ <sup>c</sup> |    | ✓ <sup>d</sup> |    | ✓              |      |    |      |    |      |    |      | ✓              |

<sup>a</sup> soon after birth; <sup>b</sup> if indicated by skin prick test result; <sup>c</sup> 7 $\pm$ 4 days post randomisation; <sup>d</sup> 5-8 months of age; d, days; m, months; y, year

### Parent questionnaires

To collect data on potential confounding factors and for stratification prior to randomisation, baseline parent questionnaires will be used to collect data on demographic, environmental, prenatal, and birth factors (Table 2). When the participants are 3, 6, 9 and 12 months of age, questionnaires will be provided to parents to collect data on diet, medications and potential environmental confounders, and to collect data for primary and secondary outcomes (Table 3).

Table 2: Baseline questionnaire data

|                        |                                                                                                                                                          |
|------------------------|----------------------------------------------------------------------------------------------------------------------------------------------------------|
| Family and demographic | Family history of allergic disease (allergy, eczema, hay fever, asthma), maternal BCG vaccination, parent education, parent country of birth, ethnicity. |
|------------------------|----------------------------------------------------------------------------------------------------------------------------------------------------------|

|                       |                                                                                                                                                |
|-----------------------|------------------------------------------------------------------------------------------------------------------------------------------------|
| Household environment | Size, composition, smoking, pets.                                                                                                              |
| Maternal prenatal     | Age, weight, height, prior pregnancies, vaccinations, smoking, antibiotics, vitamin D, probiotics other medications or supplements.            |
| Birth                 | Mode of delivery*, birth site*, plurality*, birth complications, gestational age, weight, sex, antibiotics or other medications during labour. |

\* Required for stratification prior to randomisation

Table 3: Three- and six-monthly questionnaire outcome data

|           |                                                                                                                                                                                                                                                                                                                            |
|-----------|----------------------------------------------------------------------------------------------------------------------------------------------------------------------------------------------------------------------------------------------------------------------------------------------------------------------------|
| Illnesses | Any episode of illness, infant age, duration of illness, symptoms, medial consultations and hospital admissions, diagnosis and any treatments/medications.                                                                                                                                                                 |
| Eczema    | Symptoms of eczema, infant age at onset of eczema, distribution of eczema, use of eczema medications, medical consultations and hospital admissions. Includes modified U.K. working party's diagnostic criteria for atopic dermatitis and modified patient-oriented eczema measure (POEM) tool questions. <sup>52 53</sup> |
| Allergies | Any episodes of food or other allergies, infant age, allergen, symptoms, severity, diagnosis and any treatment.                                                                                                                                                                                                            |
| Asthma    | International study of asthma and allergies in childhood (ISAAC) questions, <sup>54 55</sup> asthma medication usage, symptom severity, acute exacerbations and health care utilisation, including hospitalisations                                                                                                        |
| Diet      | Breast milk feeding, formula milk feeding, food introduction, dietary supplements.                                                                                                                                                                                                                                         |
| Other     | Household composition, childcare, pets and other animals, household smoking, drinking water source, vaccinations, other medications or supplements, other diseases/disabilities, BCG complications, overseas travel, non-illness associated hospital admissions.                                                           |

### Clinical assessments

Allergic sensitisation: Skin prick testing (SPT) to the following panel of allergens will be assessed: food allergens - cow's milk, raw egg, peanut, sesame, cashew, hazelnut, shellfish, walnut (at 5-year visit only); other allergens - *Dermatophagoides pteronyssinus 1* (house dust mite), cat, dog, *Alternaria tenuis* (mould) and rye grass pollen. SPT will be done according to standard guidelines.<sup>39</sup> For each food allergen tested, data will also be collected on prior ingestion, exposure, reactions and tolerance (after the SPT wheal size is assessed).

Eczema: Severity of eczema will be assessed using Scoring of Atopic Dermatitis (SCORAD).<sup>40</sup>

Oral food challenge (OFC): Participants with a wheal diameter  $\geq 1$  mm greater than the negative control to selected food allergens during SPT will be invited to have an OFC as detailed in supplementary Figure 1. OFCs will be done at MCRI according to Australasian Society of Clinical Immunology and Allergy (ASCIA) guidelines as used by the RCH Allergy Clinic and the HealthNuts study.<sup>41</sup> The different pathways that will occur during an OFC detailed in supplementary Figure 2.

1  
2  
3 Other: Weight, height, skin, eye and hair colour, BCG vaccination site including scar  
4 measurement and photograph. BCG vaccination site assessment will occur after all other  
5 assessments are complete.  
6

### 7 8 **Biological sample collection**

9 Full blood examination: A capillary blood sample will be collected from participants soon  
10 after birth as a preliminary screen for primary T-cell immunodeficiencies. This may be done  
11 before or after randomisation.  
12

13 Peripheral blood: Peripheral blood samples will be collected at 7 days, 7 months, 1 year and 5  
14 years of age. These samples will be used for immediate immune stimulation experiments as  
15 well as separation and storage of peripheral blood mononuclear cells and granulocytes,  
16 plasma and plasma-depleted cells at -80°C or in liquid nitrogen, as appropriate. These  
17 samples will be retained for future immunological analysis.  
18  
19

20 Stool: From the day of birth participant's parents will be requested to collect a stool sample  
21 on each day (up to seven samples) and store it in a domestic freezer until collection at the 7-  
22 day post randomisation study visit. Additional stool samples will be collected during the 7-  
23 month and 1-year study visits or by parents prior to the one-year study visit using an in-home  
24 stool collection kit provided by the study team.  
25  
26

## 27 **Outcomes**

### 28 **Primary outcomes**

29 The primary outcomes are the proportions of infants with the following measures of allergic  
30 disease and infection at 1 year and 5 years of age:  
31

- 32 • atopic sensitisation (positive SPT) to one or more of a panel of food and aeroallergens
- 33 • eczema
- 34 • lower respiratory tract infection (LRTI)
- 35 • asthma (5 years of age only)
- 36
- 37

### 38 **Secondary outcomes**

39 The secondary outcomes are the following additional measures of allergy and infection:  
40

#### 41 **Allergy**

42 The proportion of infants with clinical food allergy (Supplementary figures 1-2); atopic  
43 sensitisation with  $\geq 3$  mm wheal diameter; atopic sensitisation to multiple allergens; parent  
44 report of food allergy to any food; atopic sensitisation to egg allergen; atopic wheeze.  
45  
46

#### 47 **Eczema**

48 Severity of eczema; age of onset of eczema; and proportions of clinically diagnosed eczema  
49 and steroid use for eczema.  
50

#### 51 **Infections**

52 Proportion of infants with or frequency of the following: any infection; upper respiratory tract  
53 infection; LRTI; diarrhoea with vomiting; rash with fever; fever; hospitalisation for infection;  
54 hospitalisation for respiratory tract infection.  
55  
56

#### 57 **Asthma,**

58 The proportion of infants with current asthma, asthma severity and medication use for asthma  
59  
60

### Sample size and power calculation

This study aims to randomise a total of 1,438 participants. This sample size is calculated based on an assumed minimum 80% retention rate, resulting in an expected minimum 1,150 infants with 1-year data available. With a final sample size of 575 in each arm, this study is powered to detect a minimum 35% reduction in atopic sensitisation, 25% reduction in eczema and 25% reduction in LRTI with a power of 80% in the first year of life and a minimum 37% reduction in atopic sensitisation, 26% reduction in eczema, 26% reduction in LRTI and 27% reduction in asthma with a power of 80% at five years of age. These differences are based on the previously reported prevalence of atopic sensitisation, eczema, LRTI and asthma in Australian infants at 1 and 5 years of age.<sup>35 36 42</sup>

### Recruitment

Recruitment will occur in two stages: (1) early consent will be sought from pregnant women attending antenatal clinics or in the postnatal ward at a study site; (2) additional pregnant women or mothers interested in participating but not being cared for at a study site may also be recruited if they contact the research team antenatally or within 10 days of delivery. Consent to participate in the study will be verbally confirmed after the birth of antenatally recruited infants and prior to randomisation.

### Randomisation

Recruited neonates will only be randomised after confirmation that they still fulfil inclusion criteria and do not meet any exclusion criteria. Randomisation to BCG-vaccination or no BCG vaccination will be done in a 1:1 ratio using the REDCap randomisation function.<sup>38</sup> The randomisation schedule will be established by a statistician external to the study using random permuted blocks with a minimum of three different block sizes. Randomisation will be stratified by: (i) site (hospital); (ii) method of delivery (Caesarean vs non-Caesarean); and (iii) plurality of birth (twins vs singletons). Twins will be assigned to the same intervention arm.

### Blinding

As BCG vaccination results in the formation of a scar at the vaccination site in 93-99% of infants,<sup>43-46</sup> blinding with the use of a placebo is not possible. For blinding of clinical assessments, prior to commencement of the 1- and 5-year study visits, each participant's left upper arm will be covered with a bandage by the parent or a member of the study team not involved with the assessment to hide the potential scar site. Clinical assessments will be done by a member of the study team or clinical staff member who was not involved in the randomisation of the participant.

### Statistical analysis

Statistical analysis of primary and secondary outcomes will be overseen by the trial statistician. Primary analysis will be by intention to treat, including all randomised participants where outcome data are available. Data will be collected according to Consolidated Standards of Reporting Trials (CONSORT) guidelines for reporting randomised trials.<sup>47</sup>

### Outcomes

#### Primary outcomes

1  
2  
3 Comparison between BCG-vaccinated and BCG-naïve infants will be estimated using binary  
4 regression adjusted for the stratification factors used during randomisation. Results will be  
5 presented as risk difference with 95% confidence intervals (CI).  
6

### 7 8 **Secondary outcomes**

9 Comparison between the BCG-vaccinated and BCG-naïve infants will be estimated using  
10 binary linear or Poisson regression adjusted for the stratification factors used during  
11 randomisation. Results will be presented as risk difference with 95% CI.  
12

### 13 14 **Missing data**

15 If the proportion of missing data is less than 5%, the primary analysis will be a complete case  
16 analysis. Otherwise, the frequency and patterns of missing data will be examined and, if  
17 appropriate, multiple imputation models will be conducted for the outcome variables. Fifty  
18 completed data sets will be imputed by chained equations including all the children initially  
19 randomised. The primary outcome, strata variable (mode of birth: vaginal/caesarean), and the  
20 variables predictive of missingness and allergy, eczema, infection or asthma will be included  
21 in the imputation model.  
22

### 23 24 **Subgroup analysis**

25 Prior to any subgroup analysis, adjusted models including the stratification factors used in  
26 randomisation, the randomisation assignment and the subgroup variable as covariates will be  
27 used to estimate the interaction between the intervention and the subgroup variable. Where  
28 these models provide evidence that the intervention varies between subgroups, specific  
29 subgroup estimates and confidence intervals will be presented obtained from the adjusted  
30 model. The subgroups are presence or absence of BCG scar; timing of BCG  
31 administration; maternal BCG vaccination; sex; mode of delivery; season of birth; timing of  
32 hepatitis B vaccination. For allergy, eczema and asthma outcomes, an additional subgroup  
33 variable, family history of allergic disease or asthma, will be assessed.  
34  
35

### 36 37 **Data monitoring and auditing**

38 The independent Data Safety and Monitoring Committee (DSMC), consisting of an  
39 independent statistician, neonatologist and paediatric infectious diseases consultant will meet  
40 to review data and participant safety 6-monthly.  
41

### 42 43 **Risks**

44 The potential risks of participation in this study may be related to: (1) adverse reactions to  
45 BCG vaccination: subcutaneous abscess, exaggerated local reaction, lymphadenitis, keloid  
46 scarring, osteitis and disseminated infection.<sup>48</sup> In Australia, adverse reactions to BCG vaccine  
47 occur in 15.3 out of 10,000 doses;<sup>49</sup> (2) blood collection: discomfort, bruising and rarely  
48 minor infection or blood clots (3) clinical assessments of allergy: anaphylactic reactions may  
49 occur during OFC, during SPT (rare) and as a late reaction to OFC (from further allergen  
50 exposures during the subsequent week). The protocols and workflows for SPT and OFC  
51 mitigate the risk of anaphylactic reactions and their safety has been demonstrated in previous  
52 clinical trials (supplementary Figures 1 and 2).<sup>41</sup> All AE will be recorded, and SAEs reported  
53 to the study site HREC and the DSMC.  
54  
55

### 56 57 **Outlook and significance**

58 The findings of MIS BAIR will provide evidence as to whether neonatal BCG vaccination, a  
59 low-cost, readily available intervention, reduces the prevalence of allergies and infections in  
60 the first one and five years of life, and asthma in the first five years of life. An immune



priming benefit of neonatal BCG against these diseases would have considerable public health implications and thus inform guidelines for BCG vaccine policies worldwide.

### Limitations

The potential limitations of MIS BAIR include the inability to blind the parent(s)/guardian(s) to the infant's randomisation assignment. This may lead to bias or lower compliance if parent(s)/guardian(s) are disappointed with the randomisation assignment. However, blinding will be done for the 13-month study clinical assessments from which several of the primary and secondary outcomes measures of allergy and eczema are obtained. We expect that there will be greater recruitment of participants with a family history of allergic disease, which may limit the generalisability of our findings. We will therefore collect data in relation to family history to enable us to consider for this in later analyses. BCG was followed by multiple administrations of non-live vaccines, and this might attenuate the beneficial non-specific effects of BCG.<sup>50 51</sup>

### ETHICS AND DISSEMINATION

This trial has been approved by the Mercy Health Human Research Ethics Committee (HREC, No. R12-28) and RCH HREC (No. 33025) with governance approval from Barwon Health and St John of God, Geelong. A record of consents and refusals will be maintained on the study REDCap database. Parent(s)/guardian(s) of participants will be informed of their option to withdraw from the study at any time. An electronic or hard copy parent /guardian information and consent form (PGICF) will be completed a parent/guardian as part of the consent process. Results of this trial will be published in peer-reviewed journals and presented at scientific conferences.

**Contributors** NC is the lead investigator and responsible for study conception, design and funding acquisition. KG developed the trial database. KG, NC, BF, SD, LC, CZ developed the ethics application and all other authors provided critical evaluation and revision. DC, KG, PV, CM, VA, NC developed the recruitment methods. KG, BF, VA, ALP, KA, PV developed and SD, MS, NC contributed to the design of the questionnaires. KG, KA developed and ALP, NC, PV contributed to the clinical assessment methods. CZ, NC, BF, SG, KF developed and KG, NM, RRB, PV contributed to biological sample collection and processing methods. SD developed the statistical analysis plan. NC, KG, KA, FS, VA, NM, MS contributed to and ALP, KF, RRB, PV, DC provided critical evaluation and revision. NM drafted the manuscript, co-ordinated manuscript preparation and revision. All authors provided critical evaluation and revision of the manuscript, and have approved the final version of this manuscript.

**Funding** This study is funded by research grants from the National Health and Medical Research Council (NHMRC) of Australia, The University of Melbourne, RCH foundation and MCRI.

**Disclaimer** The study funders did not have authority over the study design or preparation of this report.

**Competing Interests** KA has received speaker's honoraria from Abbott, Danone, Nestle and Alphapharm. All other authors have no competing interests to declare.

**Patient consent** Parent/guardian consent obtained

**Ethics approval** Mercy Health HREC and RCH HREC

**Provenance and peer review** Not commissioned; externally peer reviewed.

**Open Access** This is an open access article distributed in accordance with the Creative Commons Attribution Non Commercial (CC BY-NC 4.0) license, which permits others to distribute, remix, adapt, build upon this work non-commercially, and license their derivative works on different terms, provided the original work is properly cited, appropriate credit is given, any changes made indicated, and the use is non-commercial. See: <http://creativecommons.org/licenses/by-nc/4.0/>.

## REFERENCES

1. World Health Organization. Immunization coverage estimates by WHO region: BCG: World Health Organization; 2018 [updated 19th July 2018. Available from: <http://apps.who.int/gho/data/view.main.81500?lang=en> accessed 1st June 2019 2019.
2. Higgins JP, Soares-Weiser K, Lopez-Lopez JA, et al. Association of BCG, DTP, and measles containing vaccines with childhood mortality: systematic review. *BMJ* 2016;355:i5170. doi: 10.1136/bmj.i5170 [published Online First: 2016/10/16]
3. Pollard AJ, Finn A, Curtis N. Non-specific effects of vaccines: plausible and potentially important, but implications uncertain. *Arch Dis Child* 2017;102(11):1077-81. doi: 10.1136/archdischild-2015-310282 [published Online First: 2017/05/16]
4. Biering-Sorensen S, Aaby P, Lund N, et al. Early BCG-Denmark and Neonatal Mortality Among Infants Weighing <2500 g: A Randomized Controlled Trial. *Clin Infect Dis* 2017;65(7):1183-90. doi: 10.1093/cid/cix525 [published Online First: 2018/03/27]
5. Aaby P, Roth A, Ravn H, et al. Randomized trial of BCG vaccination at birth to low-birth-weight children: beneficial nonspecific effects in the neonatal period? *J Infect Dis* 2011;204(2):245-52. doi: 10.1093/infdis/jir240 [published Online First: 2011/06/16]
6. Freyne B, Curtis N. Does neonatal BCG vaccination prevent allergic disease in later life? *Arch Dis Child* 2014;99(2):182-4. doi: 10.1136/archdischild-2013-305655 [published Online First: 2014/01/15]
7. Arnoldussen DL, Linehan M, Sheikh A. BCG vaccination and allergy: a systematic review and meta-analysis. *J Allergy Clin Immunol* 2011;127(1):246-53, 53 e1-21. doi: 10.1016/j.jaci.2010.07.039 [published Online First: 2010/10/12]
8. Rousseau MC, Parent ME, St-Pierre Y. Potential health effects from non-specific stimulation of the immune function in early age: the example of BCG vaccination. *Pediatr Allergy Immunol* 2008;19(5):438-48. doi: 10.1111/j.1399-3038.2007.00669.x [published Online First: 2008/01/03]
9. El-Zein M, Parent ME, Benedetti A, et al. Does BCG vaccination protect against the development of childhood asthma? A systematic review and meta-analysis of epidemiological studies. *Int J Epidemiol* 2010;39(2):469-86. doi: 10.1093/ije/dyp307 [published Online First: 2009/10/14]
10. Steenhuis TJ, van Aalderen WM, Bloksma N, et al. Bacille-Calmette-Guerin vaccination and the development of allergic disease in children: a randomized, prospective, single-blind study. *Clin Exp Allergy* 2008;38(1):79-85. doi: 10.1111/j.1365-2222.2007.02859.x [published Online First: 2007/10/25]
11. Thostesen LM, Kjaergaard J, Pihl GT, et al. Neonatal BCG vaccination and atopic dermatitis before 13 months of age: A randomized clinical trial. *Allergy* 2018;73(2):498-504. doi: 10.1111/all.13314 [published Online First: 2017/09/21]
12. Asher MI, Montefort S, Bjorksten B, et al. Worldwide time trends in the prevalence of symptoms of asthma, allergic rhinoconjunctivitis, and eczema in childhood: ISAAC Phases One and Three repeat multicountry cross-sectional surveys. *Lancet* 2006;368(9537):733-43. doi: 10.1016/S0140-6736(06)69283-0 [published Online First: 2006/08/29]
13. Mullins RJ. Paediatric food allergy trends in a community-based specialist allergy practice, 1995-2006. *Med J Aust* 2007;186(12):618-21. [published Online First: 2007/06/20]
14. Sicherer SH, Munoz-Furlong A, Sampson HA. Prevalence of peanut and tree nut allergy in the United States determined by means of a random digit dial telephone survey: a 5-year follow-up study. *J Allergy Clin Immunol* 2003;112(6):1203-7. doi: 10.1016/S0091 [published Online First: 2003/12/06]
15. Gupta R, Sheikh A, Strachan D, et al. Increasing hospital admissions for systemic allergic disorders in England: analysis of national admissions data. *BMJ* 2003;327(7424):1142-3. doi: 10.1136/bmj.327.7424.1142 [published Online First: 2003/11/15]
16. Downs SH, Marks GB, Sporik R, et al. Continued increase in the prevalence of asthma and atopy. *Arch Dis Child* 2001;84(1):20-23. [published Online First: 2000/12/22]
17. Strachan DP. Hay fever, hygiene, and household size. *BMJ* 1989;299(6710):1259-60. [published Online First: 1989/11/18]
18. Netea MG, Quintin J, van der Meer JW. Trained immunity: a memory for innate host defense. *Cell Host Microbe* 2011;9(5):355-61. doi: 10.1016/j.chom.2011.04.006 [published Online First: 2011/05/18]
19. Novakovic B, Messina N, Curtis N. Chapter 6 - The Heterologous Effects of Bacillus Calmette-Guérin (BCG) Vaccine and Trained Innate Immunity. In: Faustman DL, ed. *The Value of BCG and TNF in Autoimmunity (Second Edition)*. Second edition. ed: Academic Press 2018:71-90.

20. Marchant A, Goetghebuer T, Ota MO, et al. Newborns develop a Th1-type immune response to Mycobacterium bovis bacillus Calmette-Guerin vaccination. *J Immunol* 1999;163(4):2249-55. [published Online First: 1999/08/10]
21. Kleinnijenhuis J, Quintin J, Preijers F, et al. Long-lasting effects of BCG vaccination on both heterologous Th1/Th17 responses and innate trained immunity. *J Innate Immun* 2014;6(2):152-8. doi: 10.1159/000355628 [published Online First: 2013/11/07]
22. Messina NL, Zimmermann P, Curtis N. The impact of vaccines on heterologous adaptive immunity. *Clin Microbiol Infect* 2019 doi: 10.1016/j.cmi.2019.02.016 [published Online First: 2019/02/24]
23. de Castro MJ, Pardo-Seco J, Martinon-Torres F. Nonspecific (Heterologous) Protection of Neonatal BCG Vaccination Against Hospitalization Due to Respiratory Infection and Sepsis. *Clin Infect Dis* 2015;60(11):1611-9. doi: 10.1093/cid/civ144 [published Online First: 2015/03/01]
24. Hollm-Delgado MG, Stuart EA, Black RE. Acute lower respiratory infection among Bacille Calmette-Guerin (BCG)-vaccinated children. *Pediatrics* 2014;133(1):e73-81. doi: 10.1542/peds.2013-2218 [published Online First: 2014/01/01]
25. Aaby P, Mogensen SW, Rodrigues A, et al. Evidence of Increase in Mortality After the Introduction of Diphtheria-Tetanus-Pertussis Vaccine to Children Aged 6-35 Months in Guinea-Bissau: A Time for Reflection? *Front Public Health* 2018;6:79. doi: 10.3389/fpubh.2018.00079 [published Online First: 2018/04/05]
26. Aaby P, Ravn H, Benn CS. The WHO Review of the Possible Nonspecific Effects of Diphtheria-Tetanus-Pertussis Vaccine. *Pediatr Infect Dis J* 2016;35(11):1247-57. doi: 10.1097/INF.0000000000001269 [published Online First: 2016/10/19]
27. Kjaergaard J, Birk NM, Nissen TN, et al. Nonspecific effect of BCG vaccination at birth on early childhood infections: a randomized, clinical multicenter trial. *Pediatr Res* 2016;80(5):681-85. doi: 10.1038/pr.2016.142 [published Online First: 2016/11/02]
28. Haahr S, Michelsen SW, Andersson M, et al. Non-specific effects of BCG vaccination on morbidity among children in Greenland: a population-based cohort study. *Int J Epidemiol* 2016;45(6):2122-30. doi: 10.1093/ije/dyw244 [published Online First: 2016/01/01]
29. Benn CS, Sorup S. Commentary: BCG has no beneficial non-specific effects on Greenland. An answer to the wrong question? *Int J Epidemiol* 2016;45(6):2131-33. doi: 10.1093/ije/dyw299 [published Online First: 2016/11/20]
30. World Health Organization. Global Hepatitis Report 2017. Geneva: World Health Organization, 2017:83.
31. Loh W, Tang MLK. The Epidemiology of Food Allergy in the Global Context. *Int J Environ Res Public Health* 2018;15(9) doi: 10.3390/ijerph15092043 [published Online First: 2018/09/21]
32. Peters RL, Koplin JJ, Gurrin LC, et al. The prevalence of food allergy and other allergic diseases in early childhood in a population-based study: HealthNuts age 4-year follow-up. *J Allergy Clin Immunol* 2017;140(1):145-53 e8. doi: 10.1016/j.jaci.2017.02.019 [published Online First: 2017/05/19]
33. Prescott SL, Pawankar R, Allen KJ, et al. A global survey of changing patterns of food allergy burden in children. *World Allergy Organ J* 2013;6(1):21. doi: 10.1186/1939-4551-6-21 [published Online First: 2013/12/07]
34. Martin PE, Koplin JJ, Eckert JK, et al. The prevalence and socio-demographic risk factors of clinical eczema in infancy: a population-based observational study. *Clin Exp Allergy* 2013;43(6):642-51. doi: 10.1111/cea.12092 [published Online First: 2013/05/29]
35. Osborne NJ, Koplin JJ, Martin PE, et al. Prevalence of challenge-proven IgE-mediated food allergy using population-based sampling and predetermined challenge criteria in infants. *J Allergy Clin Immunol* 2011;127(3):668-76 e1-2. doi: 10.1016/j.jaci.2011.01.039 [published Online First: 2011/03/08]
36. Australian Centre for Asthma Monitoring. Asthma in Australia 2011. AIHW Asthma Series: no 4 Cat no ACM 22. Canberra: Australian Institute of Health and Welfare, 2011.
37. The BCG vaccine: information and recommendations for use in Australia. National Tuberculosis Advisory Committee update October 2012. *Commun Dis Intell Q Rep* 2013;37(1):E65-72. [published Online First: 2013/07/12]
38. Harris PA, Taylor R, Thielke R, et al. Research electronic data capture (REDCap)--a metadata-driven methodology and workflow process for providing translational research informatics support. *J Biomed Inform* 2009;42(2):377-81. doi: 10.1016/j.jbi.2008.08.010 [published Online First: 2008/10/22]



39. Australasian Society of Clinical Immunology and Allergy (ASCIA) SPTWP. Skin prick testing for the diagnosis of allergic disease: A manual for practitioners Sydney: ASCIA; 2016 [Available from: <https://allergy.org.au/hp/papers/skin-prick-testing/>].
40. Pucci N, Novembre E, Cammarata MG, et al. Scoring atopic dermatitis in infants and young children: distinctive features of the SCORAD index. *Allergy* 2005;60(1):113-6. doi: 10.1111/j.1398-9995.2004.00622.x [published Online First: 2004/12/04]
41. Osborne NJ, Koplin JJ, Martin PE, et al. The HealthNuts population-based study of paediatric food allergy: validity, safety and acceptability. *Clin Exp Allergy* 2010;40(10):1516-22. doi: 10.1111/j.1365-2222.2010.03562.x [published Online First: 2010/07/09]
42. Kusel MM, de Klerk NH, Holt PG, et al. Role of respiratory viruses in acute upper and lower respiratory tract illness in the first year of life: a birth cohort study. *Pediatr Infect Dis J* 2006;25(8):680-6. doi: 10.1097/01.inf.0000226912.88900.a3 [published Online First: 2006/07/29]
43. Anderson EJ, Webb EL, Mawa PA, et al. The influence of BCG vaccine strain on mycobacteria-specific and non-specific immune responses in a prospective cohort of infants in Uganda. *Vaccine* 2012;30(12):2083-9. doi: 10.1016/j.vaccine.2012.01.053 [published Online First: 2012/02/04]
44. Birk NM, Nissen TN, Ladekarl M, et al. The association between Bacillus Calmette-Guerin vaccination (1331 SSI) skin reaction and subsequent scar development in infants. *BMC Infect Dis* 2017;17(1):540. doi: 10.1186/s12879-017-2641-0 [published Online First: 2017/08/05]
45. Frankel H, Byberg S, Bjerregaard-Andersen M, et al. Different effects of BCG strains - A natural experiment evaluating the impact of the Danish and the Russian BCG strains on morbidity and scar formation in Guinea-Bissau. *Vaccine* 2016;34(38):4586-93. doi: 10.1016/j.vaccine.2016.07.022 [published Online First: 2016/08/06]
46. Funch KM, Thyssen SM, Rodrigues A, et al. Determinants of BCG scarification among children in rural Guinea-Bissau: A prospective cohort study. *Hum Vaccin Immunother* 2018;14(10):2434-42. doi: 10.1080/21645515.2017.1421879 [published Online First: 2018/01/03]
47. Turner L, Shamseer L, Altman DG, et al. Consolidated standards of reporting trials (CONSORT) and the completeness of reporting of randomised controlled trials (RCTs) published in medical journals. *Cochrane Database Syst Rev* 2012;11:MR000030. doi: 10.1002/14651858.MR000030.pub2 [published Online First: 2012/11/16]
48. World Health Organization. BCG vaccine: WHO position paper - February 2018 Weekly epidemiological record. Switzerland: World Health, Organization, 2018:73-96.
49. Hendry AJ, Dey A, Beard FH, et al. Adverse events following immunisation with bacille Calmette-Guerin vaccination: baseline data to inform monitoring in Australia following introduction of new unregistered BCG vaccine. *Commun Dis Intell Q Rep* 2016;40(4):E470-E74. [published Online First: 2017/01/04]
50. Aaby P, Kollmann TR, Benn CS. Nonspecific effects of neonatal and infant vaccination: public-health, immunological and conceptual challenges. *Nat Immunol* 2014;15(10):895-9. doi: 10.1038/ni.2961 [published Online First: 2014/09/19]
51. Shann F. BCG vaccination in developing countries. *BMJ* 2010;340:c809. doi: 10.1136/bmj.c809 [published Online First: 2010/03/17]
52. Williams HC, Burney PG, Hay RJ, et al. The U.K. Working Party's Diagnostic Criteria for Atopic Dermatitis. I. Derivation of a minimum set of discriminators for atopic dermatitis. *Br J Dermatol* 1994;131(3):383-96. [published Online First: 1994/09/01]
53. Charman CR, Venn AJ, Williams HC. The patient-oriented eczema measure: development and initial validation of a new tool for measuring atopic eczema severity from the patients' perspective. *Arch Dermatol* 2004;140(12):1513-9. doi: 10.1001/archderm.140.12.1513 [published Online First: 2004/12/22]
54. Mallol J, Crane J, von Mutius E, et al. The International Study of Asthma and Allergies in Childhood (ISAAC) Phase Three: a global synthesis. *Allergol Immunopathol (Madr)* 2013;41(2):73-85. doi: 10.1016/j.aller.2012.03.001 [published Online First: 2012/07/10]
55. Beasley R, The International Study of Asthma and Allergies in Childhood (ISAAC) Steering Committee. Worldwide variation in prevalence of symptoms of asthma, allergic rhinoconjunctivitis, and atopic eczema: ISAAC. The International Study of Asthma and Allergies in Childhood (ISAAC) Steering Committee. *Lancet* 1998;351(9111):1225-32. [published Online First: 1998/06/27]

1  
2  
3 **Melbourne Infant Study: BCG for Allergy and Infection Reduction (MIS BAIR) A**  
4 **randomised, controlled trial to determine the non-specific effects of neonatal**  
5 **BCG vaccination in a low-mortality setting**  
6

7  
8 \*NL Messina, \*K Gardiner, S Donath, K Flanagan, AL Ponsonby, F Shann, R  
9 Robins-Browne, B Freyne, V Abruzzo, C Morison, L Cox, S Germano, C Zufferey, KJ  
10 Allen, P Vuillermin, M South, D Caslaz, N Curtis  
11

12  
13 **Supplementary Figures**  
14  
15

16  
17  
18  
19  
20  
21  
22  
23  
24  
25  
26  
27  
28  
29  
30  
31  
32  
33  
34  
35  
36  
37  
38  
39  
40  
41  
42  
43  
44  
45  
46  
47  
48  
49  
50  
51  
52  
53  
54  
55  
56  
57  
58  
59  
60

For peer review only

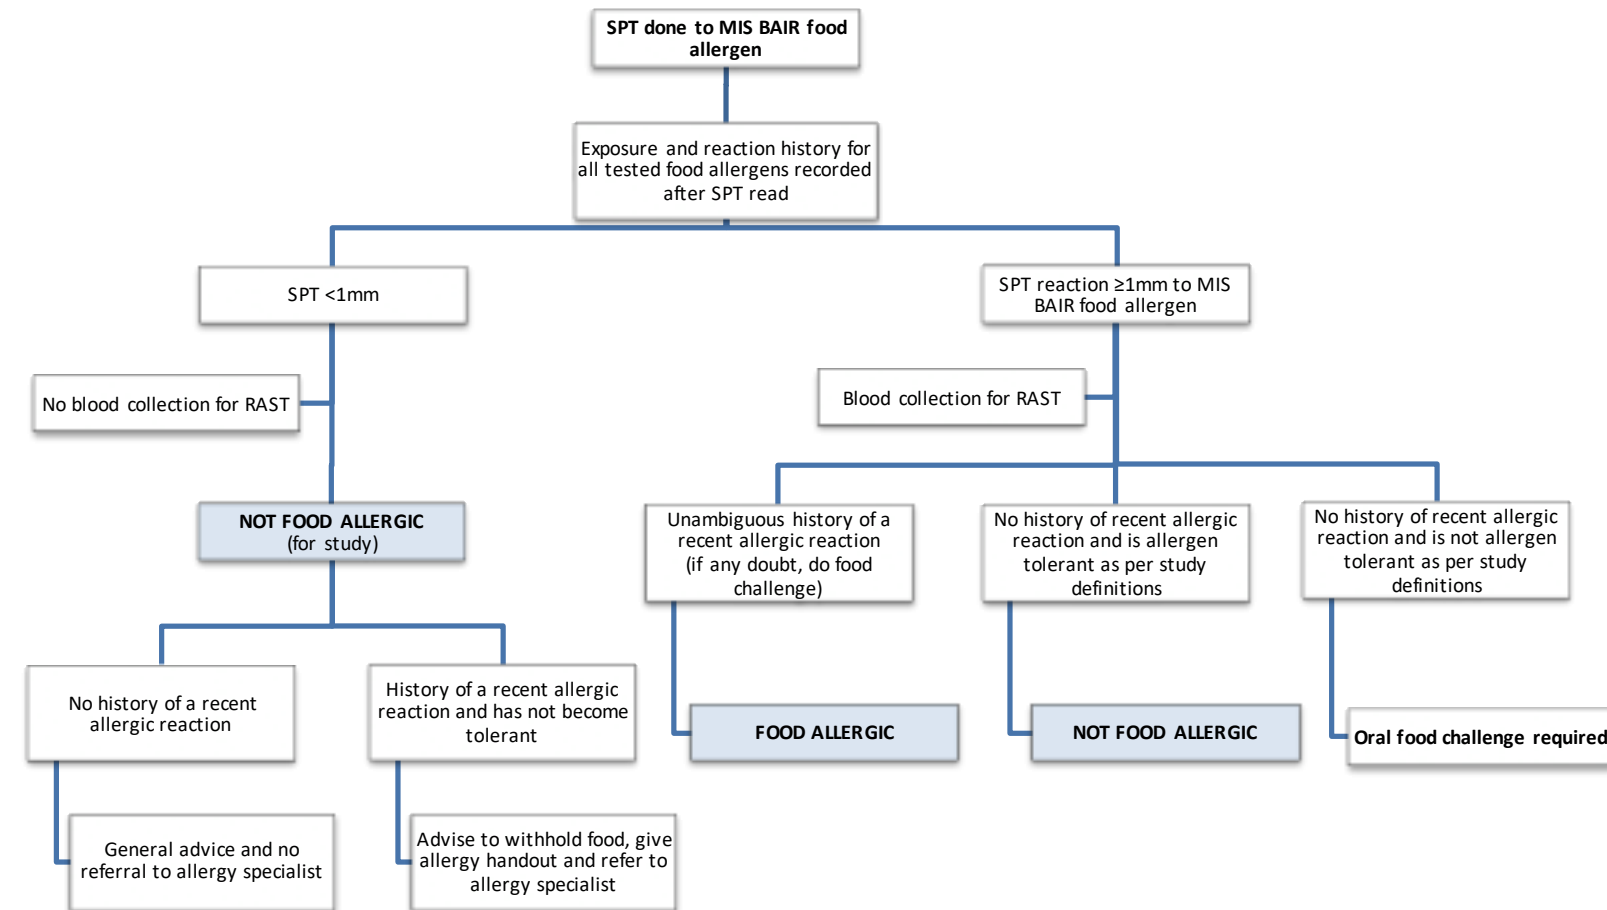

**Total dose of allergen as per food challenge protocol**

- Cows milk: 160 ml
- Raw egg white: 1x 60 g egg
- Sesame: 2 teaspoons
- Peanut: 2 teaspoons
- Cashew: 2 teaspoons
- Hazelnut: 2 teaspoons
- Shellfish: 1 peeled prawn (~15 g)

#### Definitions

**History of a recent allergic reaction:** In the past 1-2 months (1 month for egg or milk, 2 months for any other allergen), at least one of the following reactions within 30 minutes of exposure to the MIS BAIR food allergen:  $\geq 3$  non-contact concurrent hives lasting  $\geq 5$  mins, vomiting (not gagging), facial angioedema, wheeze or stridor, respiratory distress, cardiovascular compromise (pale and floppy infant, cardiac arrest).

**Allergen tolerance:** In the past 1-2 months (1 month for egg or milk, 2 months for any other allergen), infant has eaten equivalent to  $\geq$  'total dose of food challenge protocol' of allergen on 2 separate occasions without reaction.

**Adequate exposure:** Food eaten not just touched and food in form that is recognizable (e.g. not mixed nuts) unless infant has previously tolerated all the other food in the dish.

Supplementary Figure 1: MIS BAIR skin prick test flow chart

SPT skin prick test, RAST radioallergosorbent test

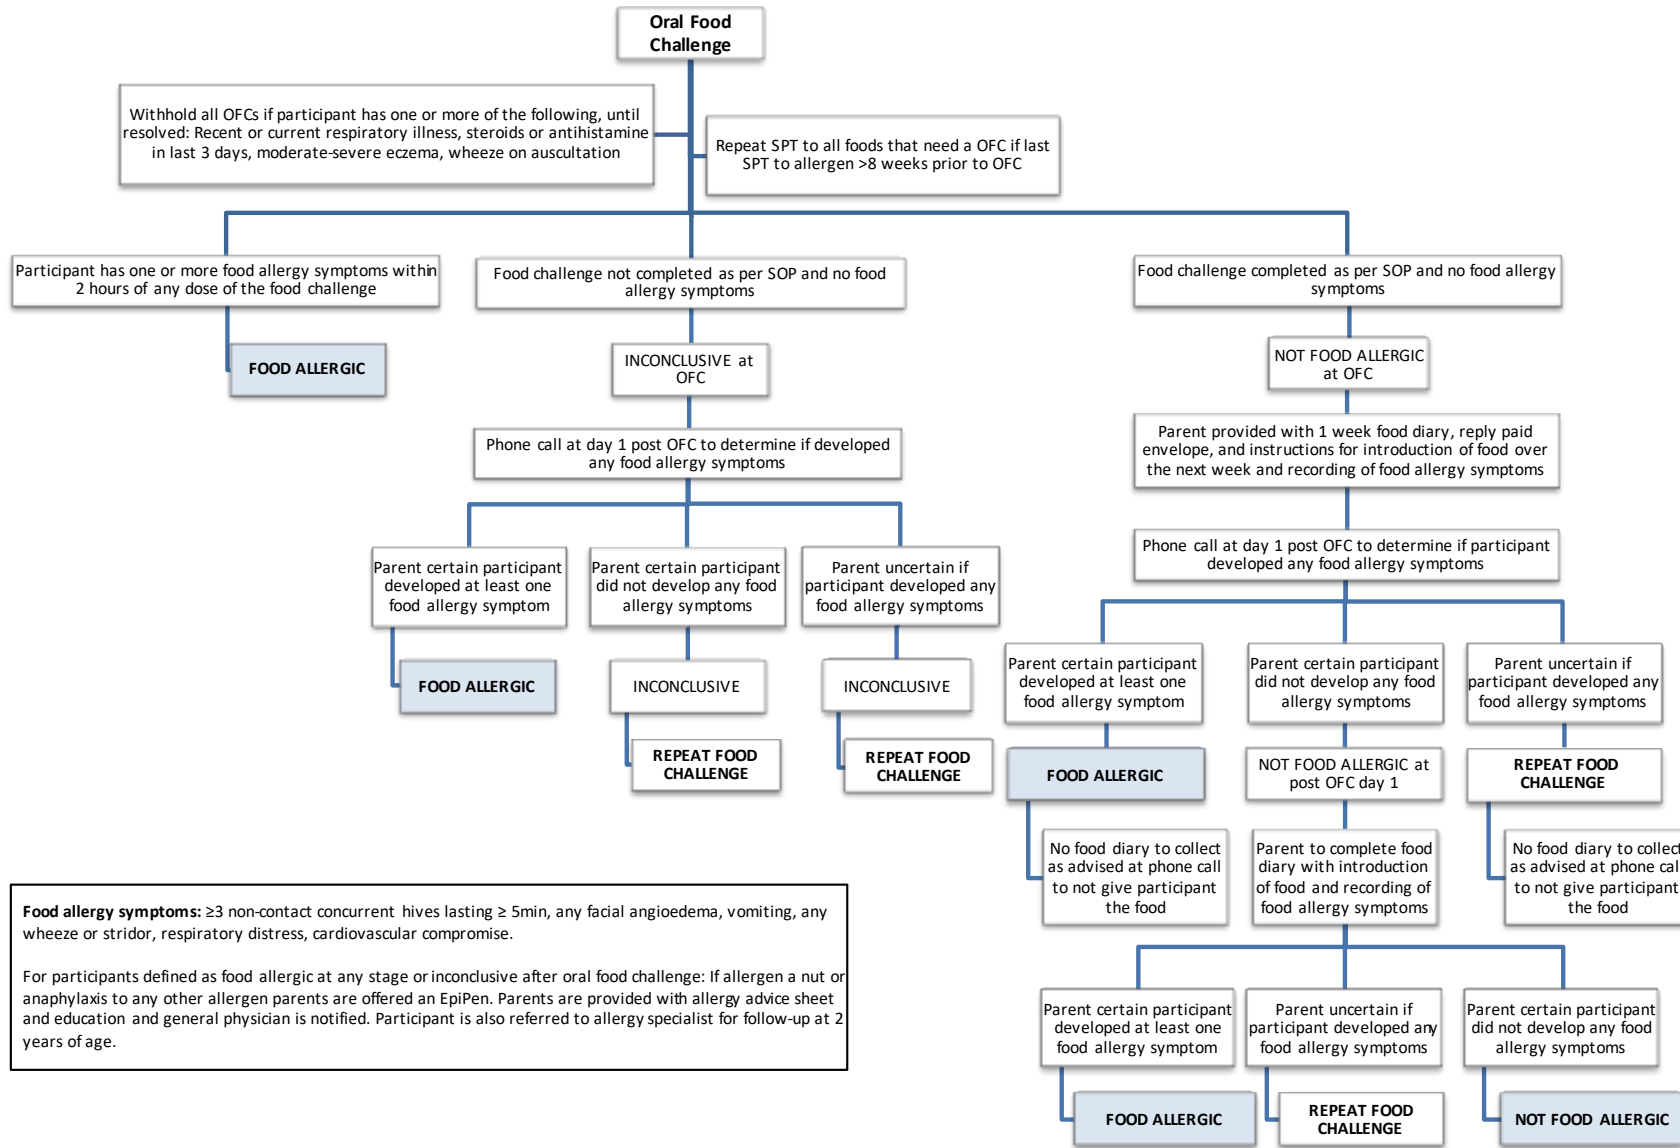

Supplementary Figure 2: MIS BAIR oral food challenge flow chart  
 OFC oral food challenge, SPT skin prick test, SOP standard operating procedure

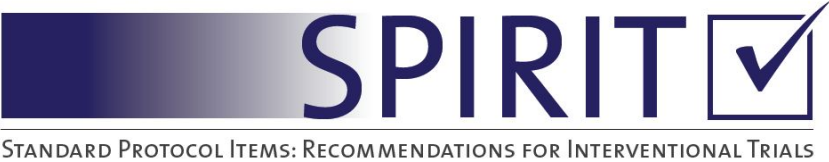

1  
2  
3  
4  
5  
6  
7  
8  
9  
10  
11  
12  
13  
14  
15  
16  
17  
18  
19  
20  
21  
22  
23  
24  
25  
26  
27  
28  
29  
30  
31  
32  
33  
34  
35  
36  
37  
38  
39  
40  
41  
42  
43  
44  
45  
46

SPIRIT 2013 Checklist: Recommended items to address in a clinical trial protocol and related documents\*

| Section/item                      | Item No | Description                                                                                                                                                                                                                                                                              | Addressed on page number            |
|-----------------------------------|---------|------------------------------------------------------------------------------------------------------------------------------------------------------------------------------------------------------------------------------------------------------------------------------------------|-------------------------------------|
| <b>Administrative information</b> |         |                                                                                                                                                                                                                                                                                          |                                     |
| Title                             | 1       | Descriptive title identifying the study design, population, interventions, and, if applicable, trial acronym                                                                                                                                                                             | _____ 1 _____                       |
| Trial registration                | 2a      | Trial identifier and registry name. If not yet registered, name of intended registry                                                                                                                                                                                                     | _____ 2 & 4 _____                   |
|                                   | 2b      | All items from the World Health Organization Trial Registration Data Set                                                                                                                                                                                                                 | Available at<br>Clinical trials.gov |
| Protocol version                  | 3       | Date and version identifier                                                                                                                                                                                                                                                              | Approved HREC<br>application        |
| Funding                           | 4       | Sources and types of financial, material, and other support                                                                                                                                                                                                                              | _____ 11 _____                      |
| Roles and responsibilities        | 5a      | Names, affiliations, and roles of protocol contributors                                                                                                                                                                                                                                  | _____ 1 & 11 _____                  |
|                                   | 5b      | Name and contact information for the trial sponsor                                                                                                                                                                                                                                       | _____ 1 _____                       |
|                                   | 5c      | Role of study sponsor and funders, if any, in study design; collection, management, analysis, and interpretation of data; writing of the report; and the decision to submit the report for publication, including whether they will have ultimate authority over any of these activities | _____ 11 _____                      |

1 5d Composition, roles, and responsibilities of the coordinating centre, steering committee, endpoint  
 2 adjudication committee, data management team, and other individuals or groups overseeing the trial, if  
 3 applicable (see Item 21a for data monitoring committee) \_\_\_\_\_11\_\_\_\_\_

4  
5  
6  
7  
8  
9 **Introduction**

10  
11 Background and 6a Description of research question and justification for undertaking the trial, including summary of relevant  
 12 rationale studies (published and unpublished) examining benefits and harms for each intervention \_\_\_\_\_3\_\_\_\_\_

13  
14  
15 6b Explanation for choice of comparators \_\_\_\_\_3\_\_\_\_\_

16 Objectives 7 Specific objectives or hypotheses \_\_\_\_\_4\_\_\_\_\_

17  
18 Trial design 8 Description of trial design including type of trial (eg, parallel group, crossover, factorial, single group),  
 19 allocation ratio, and framework (eg, superiority, equivalence, noninferiority, exploratory) \_\_\_\_\_4\_\_\_\_\_

20  
21  
22 **Methods: Participants, interventions, and outcomes**

23  
24 Study setting 9 Description of study settings (eg, community clinic, academic hospital) and list of countries where data will  
 25 be collected. Reference to where list of study sites can be obtained \_\_\_\_\_4\_\_\_\_\_

26  
27 Eligibility criteria 10 Inclusion and exclusion criteria for participants. If applicable, eligibility criteria for study centres and  
 28 individuals who will perform the interventions (eg, surgeons, psychotherapists) \_\_\_\_\_4\_\_\_\_\_

29  
30 Interventions 11a Interventions for each group with sufficient detail to allow replication, including how and when they will be  
 31 administered \_\_\_\_\_5\_\_\_\_\_

32  
33 11b Criteria for discontinuing or modifying allocated interventions for a given trial participant (eg, drug dose  
 34 change in response to harms, participant request, or improving/worsening disease) \_\_\_\_\_NA\_\_\_\_\_

35  
36 11c Strategies to improve adherence to intervention protocols, and any procedures for monitoring adherence  
 37 (eg, drug tablet return, laboratory tests) \_\_\_\_\_5\_\_\_\_\_

38  
39 11d Relevant concomitant care and interventions that are permitted or prohibited during the trial \_\_\_\_\_NA\_\_\_\_\_

|    |                      |    |                                                                                                                                                                                                                                                                                                                                                                                |           |
|----|----------------------|----|--------------------------------------------------------------------------------------------------------------------------------------------------------------------------------------------------------------------------------------------------------------------------------------------------------------------------------------------------------------------------------|-----------|
| 1  | Outcomes             | 12 | Primary, secondary, and other outcomes, including the specific measurement variable (eg, systolic blood pressure), analysis metric (eg, change from baseline, final value, time to event), method of aggregation (eg, median, proportion), and time point for each outcome. Explanation of the clinical relevance of chosen efficacy and harm outcomes is strongly recommended | ___7-8___ |
| 2  |                      |    |                                                                                                                                                                                                                                                                                                                                                                                |           |
| 3  |                      |    |                                                                                                                                                                                                                                                                                                                                                                                |           |
| 4  |                      |    |                                                                                                                                                                                                                                                                                                                                                                                |           |
| 5  |                      |    |                                                                                                                                                                                                                                                                                                                                                                                |           |
| 6  | Participant timeline | 13 | Time schedule of enrolment, interventions (including any run-ins and washouts), assessments, and visits for participants. A schematic diagram is highly recommended (see Figure)                                                                                                                                                                                               | ___5___   |
| 7  |                      |    |                                                                                                                                                                                                                                                                                                                                                                                |           |
| 8  |                      |    |                                                                                                                                                                                                                                                                                                                                                                                |           |
| 9  | Sample size          | 14 | Estimated number of participants needed to achieve study objectives and how it was determined, including clinical and statistical assumptions supporting any sample size calculations                                                                                                                                                                                          | ___8___   |
| 10 |                      |    |                                                                                                                                                                                                                                                                                                                                                                                |           |
| 11 |                      |    |                                                                                                                                                                                                                                                                                                                                                                                |           |
| 12 |                      |    |                                                                                                                                                                                                                                                                                                                                                                                |           |
| 13 | Recruitment          | 15 | Strategies for achieving adequate participant enrolment to reach target sample size                                                                                                                                                                                                                                                                                            | ___8___   |
| 14 |                      |    |                                                                                                                                                                                                                                                                                                                                                                                |           |

**Methods: Assignment of interventions (for controlled trials)**

Allocation:

|    |                                  |     |                                                                                                                                                                                                                                                                                                                                                          |         |
|----|----------------------------------|-----|----------------------------------------------------------------------------------------------------------------------------------------------------------------------------------------------------------------------------------------------------------------------------------------------------------------------------------------------------------|---------|
| 19 | Sequence generation              | 16a | Method of generating the allocation sequence (eg, computer-generated random numbers), and list of any factors for stratification. To reduce predictability of a random sequence, details of any planned restriction (eg, blocking) should be provided in a separate document that is unavailable to those who enrol participants or assign interventions | ___8___ |
| 20 |                                  |     |                                                                                                                                                                                                                                                                                                                                                          |         |
| 21 |                                  |     |                                                                                                                                                                                                                                                                                                                                                          |         |
| 22 |                                  |     |                                                                                                                                                                                                                                                                                                                                                          |         |
| 23 |                                  |     |                                                                                                                                                                                                                                                                                                                                                          |         |
| 24 |                                  |     |                                                                                                                                                                                                                                                                                                                                                          |         |
| 25 | Allocation concealment mechanism | 16b | Mechanism of implementing the allocation sequence (eg, central telephone; sequentially numbered, opaque, sealed envelopes), describing any steps to conceal the sequence until interventions are assigned                                                                                                                                                | ___8___ |
| 26 |                                  |     |                                                                                                                                                                                                                                                                                                                                                          |         |
| 27 |                                  |     |                                                                                                                                                                                                                                                                                                                                                          |         |
| 28 |                                  |     |                                                                                                                                                                                                                                                                                                                                                          |         |
| 29 | Implementation                   | 16c | Who will generate the allocation sequence, who will enrol participants, and who will assign participants to interventions                                                                                                                                                                                                                                | ___8___ |
| 30 |                                  |     |                                                                                                                                                                                                                                                                                                                                                          |         |
| 31 |                                  |     |                                                                                                                                                                                                                                                                                                                                                          |         |
| 32 |                                  |     |                                                                                                                                                                                                                                                                                                                                                          |         |
| 33 | Blinding (masking)               | 17a | Who will be blinded after assignment to interventions (eg, trial participants, care providers, outcome assessors, data analysts), and how                                                                                                                                                                                                                | ___9___ |
| 34 |                                  |     |                                                                                                                                                                                                                                                                                                                                                          |         |
| 35 |                                  |     |                                                                                                                                                                                                                                                                                                                                                          |         |
| 36 |                                  | 17b | If blinded, circumstances under which unblinding is permissible, and procedure for revealing a participant's allocated intervention during the trial                                                                                                                                                                                                     | ___9___ |
| 37 |                                  |     |                                                                                                                                                                                                                                                                                                                                                          |         |
| 38 |                                  |     |                                                                                                                                                                                                                                                                                                                                                          |         |

**Methods: Data collection, management, and analysis**

|    |                            |     |                                                                                                               |               |
|----|----------------------------|-----|---------------------------------------------------------------------------------------------------------------|---------------|
| 1  | Data collection            | 18a | Plans for assessment and collection of outcome, baseline, and other trial data, including any related         | __5-7__       |
| 2  | methods                    |     | processes to promote data quality (eg, duplicate measurements, training of assessors) and a description of    |               |
| 3  |                            |     | study instruments (eg, questionnaires, laboratory tests) along with their reliability and validity, if known. |               |
| 4  |                            |     | Reference to where data collection forms can be found, if not in the protocol                                 |               |
| 5  |                            |     |                                                                                                               |               |
| 6  |                            | 18b | Plans to promote participant retention and complete follow-up, including list of any outcome data to be       | __9__         |
| 7  |                            |     | collected for participants who discontinue or deviate from intervention protocols                             |               |
| 8  |                            |     |                                                                                                               |               |
| 9  | Data management            | 19  | Plans for data entry, coding, security, and storage, including any related processes to promote data quality  | Approved HREC |
| 10 |                            |     | (eg, double data entry; range checks for data values). Reference to where details of data management          | application   |
| 11 |                            |     | procedures can be found, if not in the protocol                                                               |               |
| 12 |                            |     |                                                                                                               |               |
| 13 |                            |     |                                                                                                               |               |
| 14 | Statistical methods        | 20a | Statistical methods for analysing primary and secondary outcomes. Reference to where other details of the     | 9 & clinical  |
| 15 |                            |     | statistical analysis plan can be found, if not in the protocol                                                | trials.gov    |
| 16 |                            |     |                                                                                                               |               |
| 17 |                            | 20b | Methods for any additional analyses (eg, subgroup and adjusted analyses)                                      | __9__         |
| 18 |                            |     |                                                                                                               |               |
| 19 |                            | 20c | Definition of analysis population relating to protocol non-adherence (eg, as randomised analysis), and any    |               |
| 20 |                            |     | statistical methods to handle missing data (eg, multiple imputation)                                          | __9__         |
| 21 |                            |     |                                                                                                               |               |
| 22 |                            |     |                                                                                                               |               |
| 23 | <b>Methods: Monitoring</b> |     |                                                                                                               |               |
| 24 |                            |     |                                                                                                               |               |
| 25 | Data monitoring            | 21a | Composition of data monitoring committee (DMC); summary of its role and reporting structure; statement of     | __10__        |
| 26 |                            |     | whether it is independent from the sponsor and competing interests; and reference to where further details    |               |
| 27 |                            |     | about its charter can be found, if not in the protocol. Alternatively, an explanation of why a DMC is not     |               |
| 28 |                            |     | needed                                                                                                        |               |
| 29 |                            |     |                                                                                                               |               |
| 30 |                            |     |                                                                                                               |               |
| 31 |                            | 21b | Description of any interim analyses and stopping guidelines, including who will have access to these interim  | __NA__        |
| 32 |                            |     | results and make the final decision to terminate the trial                                                    |               |
| 33 |                            |     |                                                                                                               |               |
| 34 | Harms                      | 22  | Plans for collecting, assessing, reporting, and managing solicited and spontaneously reported adverse         | __10__        |
| 35 |                            |     | events and other unintended effects of trial interventions or trial conduct                                   |               |
| 36 |                            |     |                                                                                                               |               |
| 37 | Auditing                   | 23  | Frequency and procedures for auditing trial conduct, if any, and whether the process will be independent      | __10__        |
| 38 |                            |     | from investigators and the sponsor                                                                            |               |
| 39 |                            |     |                                                                                                               |               |
| 40 |                            |     |                                                                                                               |               |

**Ethics and dissemination**



|    |                               |     |                                                                                                                                                                                                                                                                                     |                               |
|----|-------------------------------|-----|-------------------------------------------------------------------------------------------------------------------------------------------------------------------------------------------------------------------------------------------------------------------------------------|-------------------------------|
| 1  | Research ethics approval      | 24  | Plans for seeking research ethics committee/institutional review board (REC/IRB) approval                                                                                                                                                                                           | ___10___                      |
| 2  |                               |     |                                                                                                                                                                                                                                                                                     |                               |
| 3  |                               |     |                                                                                                                                                                                                                                                                                     |                               |
| 4  | Protocol amendments           | 25  | Plans for communicating important protocol modifications (eg, changes to eligibility criteria, outcomes, analyses) to relevant parties (eg, investigators, REC/IRBs, trial participants, trial registries, journals, regulators)                                                    | ___NA___                      |
| 5  |                               |     |                                                                                                                                                                                                                                                                                     |                               |
| 6  |                               |     |                                                                                                                                                                                                                                                                                     |                               |
| 7  |                               |     |                                                                                                                                                                                                                                                                                     |                               |
| 8  | Consent or assent             | 26a | Who will obtain informed consent or assent from potential trial participants or authorised surrogates, and how (see Item 32)                                                                                                                                                        | Approved HREC application     |
| 9  |                               |     |                                                                                                                                                                                                                                                                                     |                               |
| 10 |                               |     |                                                                                                                                                                                                                                                                                     |                               |
| 11 |                               | 26b | Additional consent provisions for collection and use of participant data and biological specimens in ancillary studies, if applicable                                                                                                                                               | Approved HREC application     |
| 12 |                               |     |                                                                                                                                                                                                                                                                                     |                               |
| 13 |                               |     |                                                                                                                                                                                                                                                                                     |                               |
| 14 | Confidentiality               | 27  | How personal information about potential and enrolled participants will be collected, shared, and maintained in order to protect confidentiality before, during, and after the trial                                                                                                | 5 & Approved HREC application |
| 15 |                               |     |                                                                                                                                                                                                                                                                                     |                               |
| 16 |                               |     |                                                                                                                                                                                                                                                                                     |                               |
| 17 |                               |     |                                                                                                                                                                                                                                                                                     |                               |
| 18 | Declaration of interests      | 28  | Financial and other competing interests for principal investigators for the overall trial and each study site                                                                                                                                                                       | ___11___                      |
| 19 |                               |     |                                                                                                                                                                                                                                                                                     |                               |
| 20 |                               |     |                                                                                                                                                                                                                                                                                     |                               |
| 21 | Access to data                | 29  | Statement of who will have access to the final trial dataset, and disclosure of contractual agreements that limit such access for investigators                                                                                                                                     | Approved HREC application     |
| 22 |                               |     |                                                                                                                                                                                                                                                                                     |                               |
| 23 |                               |     |                                                                                                                                                                                                                                                                                     |                               |
| 24 | Ancillary and post-trial care | 30  | Provisions, if any, for ancillary and post-trial care, and for compensation to those who suffer harm from trial participation                                                                                                                                                       | Approved HREC application     |
| 25 |                               |     |                                                                                                                                                                                                                                                                                     |                               |
| 26 |                               |     |                                                                                                                                                                                                                                                                                     |                               |
| 27 | Dissemination policy          | 31a | Plans for investigators and sponsor to communicate trial results to participants, healthcare professionals, the public, and other relevant groups (eg, via publication, reporting in results databases, or other data sharing arrangements), including any publication restrictions | ___11___                      |
| 28 |                               |     |                                                                                                                                                                                                                                                                                     |                               |
| 29 |                               | 31b | Authorship eligibility guidelines and any intended use of professional writers                                                                                                                                                                                                      | ___NA___                      |
| 30 |                               |     |                                                                                                                                                                                                                                                                                     |                               |
| 31 |                               | 31c | Plans, if any, for granting public access to the full protocol, participant-level dataset, and statistical code                                                                                                                                                                     | ___NA___                      |
| 32 |                               |     |                                                                                                                                                                                                                                                                                     |                               |
| 33 |                               |     |                                                                                                                                                                                                                                                                                     |                               |
| 34 |                               |     |                                                                                                                                                                                                                                                                                     |                               |
| 35 |                               |     |                                                                                                                                                                                                                                                                                     |                               |
| 36 | <b>Appendices</b>             |     |                                                                                                                                                                                                                                                                                     |                               |
| 37 |                               |     |                                                                                                                                                                                                                                                                                     |                               |
| 38 | Informed consent materials    | 32  | Model consent form and other related documentation given to participants and authorised surrogates                                                                                                                                                                                  | Approved HREC application     |
| 39 |                               |     |                                                                                                                                                                                                                                                                                     |                               |
| 40 |                               |     |                                                                                                                                                                                                                                                                                     |                               |
| 41 |                               |     |                                                                                                                                                                                                                                                                                     |                               |
| 42 |                               |     |                                                                                                                                                                                                                                                                                     |                               |
| 43 |                               |     |                                                                                                                                                                                                                                                                                     |                               |
| 44 |                               |     |                                                                                                                                                                                                                                                                                     |                               |
| 45 |                               |     |                                                                                                                                                                                                                                                                                     |                               |
| 46 |                               |     |                                                                                                                                                                                                                                                                                     |                               |

1 Biological  
2 specimens

33

Plans for collection, laboratory evaluation, and storage of biological specimens for genetic or molecular  
analysis in the current trial and for future use in ancillary studies, if applicable

7 & Approved  
HREC application

---

\*It is strongly recommended that this checklist be read in conjunction with the SPIRIT 2013 Explanation & Elaboration for important clarification on the items.  
Amendments to the protocol should be tracked and dated. The SPIRIT checklist is copyrighted by the SPIRIT Group under the Creative Commons  
“[Attribution-NonCommercial-NoDerivs 3.0 Unported](#)” license.

For peer review only

# BMJ Open

## Study protocol for the Melbourne Infant Study: BCG for Allergy and Infection Reduction (MIS BAIR), a randomised controlled trial to determine the non-specific effects of neonatal BCG vaccination in a low-mortality setting

|                               |                                                                                                                                                                                                                                                                                                                                                                                                                                                                                                                                                                                                                                                                                                                                                                                                                                                                                                                                                                                                                                                                                                                                                                                                                                                                                                                                                                                                                                                                                                                                                                                                                                                                                                                                                                                                                                                                                                                                                                                                                                                                                                                                                                                                                                                                                                               |
|-------------------------------|---------------------------------------------------------------------------------------------------------------------------------------------------------------------------------------------------------------------------------------------------------------------------------------------------------------------------------------------------------------------------------------------------------------------------------------------------------------------------------------------------------------------------------------------------------------------------------------------------------------------------------------------------------------------------------------------------------------------------------------------------------------------------------------------------------------------------------------------------------------------------------------------------------------------------------------------------------------------------------------------------------------------------------------------------------------------------------------------------------------------------------------------------------------------------------------------------------------------------------------------------------------------------------------------------------------------------------------------------------------------------------------------------------------------------------------------------------------------------------------------------------------------------------------------------------------------------------------------------------------------------------------------------------------------------------------------------------------------------------------------------------------------------------------------------------------------------------------------------------------------------------------------------------------------------------------------------------------------------------------------------------------------------------------------------------------------------------------------------------------------------------------------------------------------------------------------------------------------------------------------------------------------------------------------------------------|
| Journal:                      | <i>BMJ Open</i>                                                                                                                                                                                                                                                                                                                                                                                                                                                                                                                                                                                                                                                                                                                                                                                                                                                                                                                                                                                                                                                                                                                                                                                                                                                                                                                                                                                                                                                                                                                                                                                                                                                                                                                                                                                                                                                                                                                                                                                                                                                                                                                                                                                                                                                                                               |
| Manuscript ID                 | bmjopen-2019-032844.R1                                                                                                                                                                                                                                                                                                                                                                                                                                                                                                                                                                                                                                                                                                                                                                                                                                                                                                                                                                                                                                                                                                                                                                                                                                                                                                                                                                                                                                                                                                                                                                                                                                                                                                                                                                                                                                                                                                                                                                                                                                                                                                                                                                                                                                                                                        |
| Article Type:                 | Protocol                                                                                                                                                                                                                                                                                                                                                                                                                                                                                                                                                                                                                                                                                                                                                                                                                                                                                                                                                                                                                                                                                                                                                                                                                                                                                                                                                                                                                                                                                                                                                                                                                                                                                                                                                                                                                                                                                                                                                                                                                                                                                                                                                                                                                                                                                                      |
| Date Submitted by the Author: | 31-Oct-2019                                                                                                                                                                                                                                                                                                                                                                                                                                                                                                                                                                                                                                                                                                                                                                                                                                                                                                                                                                                                                                                                                                                                                                                                                                                                                                                                                                                                                                                                                                                                                                                                                                                                                                                                                                                                                                                                                                                                                                                                                                                                                                                                                                                                                                                                                                   |
| Complete List of Authors:     | <p>Messina, Nicole; Murdoch Childrens Research Institute, Infectious Diseases; The University of Melbourne Faculty of Medicine Dentistry and Health Sciences, Department of Paediatrics</p> <p>Gardiner, Kaya; Murdoch Childrens Research Institute, Infectious Diseases</p> <p>Donath, Susan; Murdoch Childrens Research Institute, Clinical Epidemiology and Biostatistics Unit; The University of Melbourne Faculty of Medicine Dentistry and Health Sciences, Department of Paediatrics</p> <p>Flanagan, Katie; University of Tasmania, School of Health Sciences; RMIT University, School of Health and Biomedical Science</p> <p>Ponsonby, Anne-Louise; Murdoch Childrens Research Institute, Center for Food and Allergy Research; The University of Melbourne Faculty of Medicine Dentistry and Health Sciences, Department of Paediatrics</p> <p>Shann, Frank; Royal Children's Hospital Melbourne, Intensive Care Unit; The University of Melbourne Faculty of Medicine Dentistry and Health Sciences, Department of Paediatrics</p> <p>RobinsBrowne, Roy; University of Melbourne, Microbiology and Immunology; Murdoch Childrens Research Institute, Infectious Diseases</p> <p>Freyne, Bridget; Murdoch Childrens Research Institute, Infectious Diseases; The University of Melbourne Faculty of Medicine Dentistry and Health Sciences, Department of Paediatrics</p> <p>Abruzzo, Veronica; Murdoch Childrens Research Institute, Infectious Diseases</p> <p>Morison, Clare; Murdoch Childrens Research Institute, Infectious Diseases</p> <p>Cox, Lianne; Murdoch Childrens Research Institute, Infectious Diseases; The University of Melbourne Faculty of Medicine Dentistry and Health Sciences, Department of Paediatrics</p> <p>Germano, Susie; Murdoch Childrens Research Institute, Infectious Diseases</p> <p>Zufferey, Christel; Murdoch Childrens Research Institute, Infectious Diseases</p> <p>Zimmermann, Petra; Murdoch Childrens Research Institute, Infectious Diseases; The University of Melbourne Faculty of Medicine Dentistry and Health Sciences, Department of Paediatrics</p> <p>Allen, Katie; Formerly of Murdoch Children's Research Institute, Centre for Food and Allergy Research</p> <p>Vuillermin, P; Deakin University School of Medicine; Barwon Health,</p> |

|                                                        |                                                                                                                                                                                                                                                                                                                                                                                                                                                                                                                                         |
|--------------------------------------------------------|-----------------------------------------------------------------------------------------------------------------------------------------------------------------------------------------------------------------------------------------------------------------------------------------------------------------------------------------------------------------------------------------------------------------------------------------------------------------------------------------------------------------------------------------|
|                                                        | Child health research unit<br>South, Mike; Royal Children's Hospital Melbourne, Department of<br>General Medicine; The University of Melbourne Faculty of Medicine<br>Dentistry and Health Sciences, Department of Paediatrics<br>Casalaz, Dan; Mercy Hospital for Women, Neonatal Intensive Care Unit<br>Curtis, Nigel; Murdoch Childrens Research Institute, Infectious Diseases,<br>Royal Children's Hospital Melbourne; The University of Melbourne Faculty<br>of Medicine Dentistry and Health Sciences, Department of Paediatrics |
| <b>&lt;b&gt;Primary Subject<br/>Heading&lt;/b&gt;:</b> | Paediatrics                                                                                                                                                                                                                                                                                                                                                                                                                                                                                                                             |
| <b>Secondary Subject Heading:</b>                      | Immunology (including allergy), Infectious diseases, Paediatrics                                                                                                                                                                                                                                                                                                                                                                                                                                                                        |
| <b>Keywords:</b>                                       | Immunology < BASIC SCIENCES, Eczema < DERMATOLOGY,<br>INFECTIOUS DISEASES, Paediatric infectious disease & immunisation <<br>PAEDIATRICS, Asthma < THORACIC MEDICINE, Allergy < THORACIC<br>MEDICINE                                                                                                                                                                                                                                                                                                                                    |
|                                                        |                                                                                                                                                                                                                                                                                                                                                                                                                                                                                                                                         |

SCHOLARONE™  
Manuscripts

1  
2  
3 **Study protocol for the Melbourne Infant Study: BCG for Allergy and Infection**  
4 **Reduction (MIS BAIR), a randomised controlled trial to determine the non-specific**  
5 **effects of neonatal BCG vaccination in a low-mortality setting**  
6

7  
8 \*Dr Nicole L Messina<sup>1,2</sup>, \*Ms Kaya Gardiner<sup>1</sup>, A/Prof Susan Donath<sup>1,2</sup>, Dr Katie  
9 Flanagan<sup>3,4,5</sup>, Dr Anne-Louise Ponsonby<sup>1,2</sup>, Prof Frank Shann<sup>2</sup>, Prof Roy Robins-Browne<sup>1,2</sup>,  
10 Dr Bridget Freyne<sup>1,2</sup>, Ms Veronica Abruzzo<sup>1</sup>, Ms Clare Morison<sup>1</sup>, Dr Lianne Cox<sup>1,2</sup>, Ms Susie  
11 Germano<sup>1</sup>, Dr Christel Zufferey<sup>1</sup>, Dr Petra Zimmermann<sup>1,2</sup>, Prof Katrina J Allen<sup>6</sup>, Prof Peter  
12 Vuillermin<sup>1,7,8,9</sup>, Prof Mike South<sup>2,10</sup>, Dr Dan Casalaz<sup>11</sup>, Prof Nigel Curtis<sup>1,2,10¶</sup>  
13  
14

15 **Author affiliations**

16 <sup>1</sup> Infectious Diseases, Clinical Epidemiology & Biostatistics Unit, Murdoch Children's  
17 Research Institute, Parkville, Victoria, Australia

18 <sup>2</sup> Departments of Paediatrics and Microbiology & Immunology, The University of  
19 Melbourne, Parkville, Victoria, Australia

20 <sup>3</sup> School of Health Sciences, University of Tasmania, Launceston, Tasmania, Australia

21 <sup>4</sup> School of Health and Biomedical Science, RMIT University, Melbourne, Victoria, Australia

22 <sup>5</sup> Department of Immunology and Pathology, Monash University, Melbourne, Victoria,  
23 Australia

24 <sup>6</sup> Formerly of Centre for Food and Allergy Research, Murdoch Children's Research Institute,  
25 Parkville, Victoria

26 <sup>7</sup> School of Medicine, Deakin University, Geelong, Victoria, Australia

27 <sup>8</sup> Child health research unit, Barwon Health, Geelong, Victoria, Australia

28 <sup>9</sup> St John of God Hospital, Geelong, Victoria, Australia

29 <sup>10</sup> Infection Diseases Unit and Department of General Medicine, The Royal Children's  
30 Hospital, Parkville, Victoria, Australia

31 <sup>11</sup> Neonatal Intensive Care Unit, Mercy Hospital for Women, Heidelberg, Victoria, Australia  
32  
33

34  
35  
36  
37 \* Joint first author  
38  
39

40 ¶ Corresponding author: Prof Nigel Curtis, Departments of Paediatrics, The University of  
41 Melbourne, The Royal Children's Hospital, Parkville, Victoria, Australia  
42 [nigel.curtis@rch.org.au](mailto:nigel.curtis@rch.org.au)  
43  
44  
45  
46  
47  
48  
49  
50  
51  
52  
53  
54  
55  
56  
57  
58  
59  
60

## ABSTRACT

**Introduction:** Bacillus Calmette-Guérin (BCG) vaccination reduces all-cause infant mortality in high-mortality settings by more than can be attributed to protection against tuberculosis. This is proposed to result from non-specific protection against non-vaccine targeted ('off-target') infections. There is also evidence that BCG protects against allergic diseases.

**Methods and analysis:** The Melbourne Infant Study: BCG for Allergy and Infection Reduction (MIS BAIR) is a phase III multicentre, single-blinded, randomised controlled trial. A total of 1438 healthy neonates will be randomised to receive either BCG vaccination or no BCG vaccination in the first 10 days of life. Measures of allergy, eczema, infection, and asthma will be obtained from parent-completed questionnaires 3 monthly in the first year and 6-monthly from one to five years of age, and clinical assessments at one and five years of age. Biological samples will also be collected for future immunological studies.

**Analysis Primary outcome:** The proportion of participants with measures of allergy and infection (atopic sensitisation, eczema, lower respiratory tract infection) at one and five years of age, and asthma at five years of age. Secondary outcomes: (1) the proportion of participants with additional measures of allergy, eczema, asthma and infections; (2) medication use for eczema and asthma; (3) the severity and age of onset of eczema and asthma; (4) the number of episodes of infection; (5) hospitalisations for infections; and (6) laboratory measures of immune responses.

**Ethics and dissemination:** This trial has ethical and governance approval from Mercy Health Human Research Ethics Committee (HREC, No. R12-28) and Royal Children's Hospital HREC (No. 33025) with additional governance approval from Barwon Health and St John of God, Geelong, Victoria. Results of this trial will be published in peer-reviewed journals and presented at scientific conferences.

*Trial Registration number:* Clinical trials.gov NCT01906853

## ARTICLE SUMMARY

### Strengths and limitations of this study

- The use of well-defined, internationally accepted outcome measures in a large-scale randomised trial
- Low TB burden in Australia reduces potential influence of *M. tuberculosis* exposure
- Use of oral food challenge in addition to skin prick testing provides a robust and clinically relevant measure of food allergy
- Inability to blind parents to infants' randomisation group due to the scar resulting from BCG vaccination
- Routine scheduled non-live vaccines administered subsequent to randomisation might attenuate the beneficial non-specific effects of BCG

## INTRODUCTION

The Bacillus Calmette-Guérin (BCG) vaccine is given to more than 85 percent of infants worldwide to protect against tuberculosis (TB).<sup>1</sup> In addition to protecting against TB, vaccination with BCG-Denmark reduces all-cause neonatal mortality in a high-mortality setting,<sup>2-4</sup> likely by protecting against non-mycobacterial infections.<sup>4,5</sup>

Observational studies suggest that the beneficial ‘non-specific’ (heterologous) effects of BCG on the developing immune system may also reduce the prevalence of allergic disease and asthma in children.<sup>6</sup> However, meta-analyses of observational studies have had inconsistent findings.<sup>7-9</sup> The two randomised controlled trials (RCTs) that have investigated the effect of BCG on infant allergic disease both found that BCG vaccination reduced infant eczema (medication for eczema at 18 months of age;<sup>10</sup> clinically diagnosed eczema at 13 months of age<sup>11</sup>) but did not have a statistically significant effect on the prevalence of allergic sensitisation or food allergy at 13 or 18 months of age. However, in these studies, allergic outcomes were determined by parent questionnaire and serum IgE, rather than clinical assessment. Studies assessing the impact of BCG vaccination on asthma have had more consistent findings with two meta-analyses concluding the BCG reduces the risk of asthma by 14-27%.<sup>7,9</sup>

As a result of a reduction in the prevalence of TB in several high- and middle-income countries, BCG has been removed from routine vaccination schedules. This might have contributed to the increased prevalence of allergic diseases over the past three decades.<sup>12-16</sup> It is proposed that, by acting as an early life microbial stimulus,<sup>17</sup> BCG prevents allergy by skewing the developing immune system in predisposed individuals away from the T helper (Th) 2 type immune response typically associated with allergy.<sup>6,8</sup>

BCG vaccination induces potent Th1 responses in neonates. In adults, it induces trained immunity in innate immune cells<sup>18,19</sup> and promotes Th1 and Th17 responses to non-mycobacterial pathogens.<sup>20-22</sup>

Two large observational studies provide further evidence that BCG vaccination protects against non-mycobacterial infections, particularly sepsis and respiratory infections.<sup>23,24</sup> However, BCG-mediated protection against these non-vaccine targeted or ‘off-target’ infections might be limited by subsequent vaccination with non-live vaccines which are proposed to counteract the beneficial non-specific effects of BCG.<sup>4,25,26</sup> Studies in a low-mortality setting, including a recent RCT of neonatal BCG vaccination,<sup>27</sup> and an observational study of over 19,000 infants,<sup>28</sup> support this hypothesis with protective effects of BCG against off-target infections most evident in early infancy, before administration of non-live vaccines.<sup>29</sup> Moreover, in the RCT, the protective effect of BCG was only evident in infants of BCG-vaccinated mothers.<sup>27</sup>

Subsequent to a 2004 WHO recommendation, an increasing number of countries have implemented routine neonatal hepatitis B vaccination.<sup>30</sup> Therefore, the potential impact of this vaccine on the beneficial non-specific effects of neonatal BCG vaccination also requires consideration.

Australia, where routine BCG vaccination was halted in the 1980s - has one of the highest rates of infant allergic disease globally.<sup>31-33</sup> It therefore represents an ideal setting in which to assess the impact of BCG on allergic disease. The Melbourne Infant Study: BCG for Allergy

and Infection Reduction (MIS BAIR) is an RCT to investigate whether neonatal BCG vaccination reduces the prevalence of allergic and infectious disease.

## STUDY AIMS

### Primary aims

To determine whether neonatal BCG vaccination compared with no BCG vaccination, reduces allergic disease, infection and asthma in infants and children in Australia.

### Secondary aims

To evaluate the immunological mechanisms underlying the non-specific effects of BCG by comparing the immune responses in BCG-vaccinated to those in BCG-naïve infants.

## METHODS AND ANALYSIS

### Study design and setting

This is a phase III multicentre, single-blinded, RCT of neonatal BCG vaccination compared with no BCG vaccination. The study was prospectively registered in clinical trials.gov NCT01906853 (Recruitment status: completed). Recruitment commenced in August 2013 and study follow-up will be completed by 2022.

The study population will be healthy neonates 0 to 10 days of age born at one of the study site hospitals in Victoria, Australia. Recent studies of the burden of allergic diseases in this population have reported high a prevalence of eczema (28%<sup>34</sup>), allergic sensitisation (18%) and clinically significant food allergy (10.4%<sup>35</sup>) at 12 months of age, as well as high rates (22%) of asthma by 4-5 years.<sup>36</sup>

Study sites comprise: the Murdoch Children's Research Institute (MCRI), Melbourne; Royal Children's Hospital (RCH) Melbourne; Mercy Hospital for Women, Heidelberg; Werribee Mercy Hospital, Werribee; University Hospital Geelong, Geelong; and St John of God Geelong Hospital, Geelong.

### Patient and Public Involvement

Patients and public were not involved in the design of this study. The results of this study will be disseminated to study participants via participant newsletter.

### Eligibility criteria

The inclusion criteria comprise: healthy neonates up to 10 days of age; birth weight greater than 1500 grams; gestational age equal to or greater than 32 weeks, mothers testing HIV negative during pregnancy, English-speaking mother and parent/legal guardian able to complete questionnaires in English and attend study visit. The exclusion criteria comprise: any indication for BCG vaccination in the first year of life as per the Australian national guidelines<sup>37</sup>; known or suspected HIV infection; infant at risk of immunodeficiency; serious underlying illness (including fever) or medical instability; skin infection or other skin condition; need for treatment with hepatitis B immunoglobulin; multiple-birth of more than twins; older sibling in the study.

### Intervention

Infants will be randomised to receive BCG vaccination or no BCG vaccination in the first 10 days of life. Infants randomised to the BCG vaccination group will be administered a single



intradermal injection of 0.05 mL *Mycobacterium bovis* BCG vaccine, Danish Strain 1331(1-4 x 10<sup>5</sup> colony forming units) over the left deltoid within 24 hours of randomisation.

### Reasons for withdrawal

Reasons for withdrawal from the study will be recorded along with demographic data. These may include: protocol violations; indication for participant to receive BCG vaccine within the first year of life;<sup>37</sup> serious adverse event (SAE) or other adverse event (AE); or guardian/parent request.

### Data and sample collection

Timing of data and sample collection in MIS BAIR is summarised in Table 1. Web-based questionnaires will be administered to parents at the time of recruitment, randomisation and when the participant is 3, 6, 9 and 12 months of age as well as 6-monthly up to 5 years of age using the Research Electronic Data Capture (REDCap) platform.<sup>38</sup> Infant perinatal data, including infections, medications and hospital admission will be obtained from the birth site records. Participants will be invited to optional study visits for biological sample collection 7 days ( $\pm$  4 days) after randomisation and at 6 months (5-8 months) of age. Infants will be invited for clinical assessment and biological sample collection at 1 year (between 11 and 24 months) and 5 years (between 5 and 6 years) of age.

Table 1: Data and sample collection schedule

| Infant age                             | Antenatal | 0-10d          | 3m | 6m             | 9m | 1y             | 1.5y | 2y | 2.5y | 3y | 3.5y | 4y | 4.5y | 5y             |
|----------------------------------------|-----------|----------------|----|----------------|----|----------------|------|----|------|----|------|----|------|----------------|
| <b>Recruitment &amp; randomisation</b> |           |                |    |                |    |                |      |    |      |    |      |    |      |                |
| Eligibility check and consent          | ✓         | ✓              |    |                |    |                |      |    |      |    |      |    |      |                |
| Baseline questionnaire                 | ✓         | ✓              |    |                |    |                |      |    |      |    |      |    |      |                |
| Birth questionnaire                    |           | ✓              |    |                |    |                |      |    |      |    |      |    |      |                |
| Randomisation $\pm$ vaccination        |           | ✓              |    |                |    |                |      |    |      |    |      |    |      |                |
| Full blood examination                 |           | ✓ <sup>a</sup> |    |                |    |                |      |    |      |    |      |    |      |                |
| <b>Post randomisation</b>              |           |                |    |                |    |                |      |    |      |    |      |    |      |                |
| Perinatal hospital data                |           | ✓              |    |                |    |                |      |    |      |    |      |    |      |                |
| Parent questionnaire                   |           |                | ✓  | ✓              | ✓  | ✓              | ✓    | ✓  | ✓    | ✓  | ✓    | ✓  | ✓    | ✓              |
| Clinical eczema assessment             |           |                |    |                |    | ✓              |      |    |      |    |      |    |      | ✓              |
| Skin prick test                        |           |                |    |                |    | ✓              |      |    |      |    |      |    |      | ✓              |
| Oral food challenge                    |           |                |    |                |    | ✓ <sup>b</sup> |      |    |      |    |      |    |      | ✓ <sup>b</sup> |
| Biological sample collection           |           | ✓ <sup>c</sup> |    | ✓ <sup>d</sup> |    | ✓              |      |    |      |    |      |    |      | ✓              |

<sup>a</sup> soon after birth; <sup>b</sup> if indicated by skin prick test result; <sup>c</sup> 7 $\pm$ 4 days post randomisation; <sup>d</sup> 5-8 months of age; d, days; m, months; y, year

### Parent questionnaires

To collect data on potential confounding factors and for stratification prior to randomisation, baseline parent questionnaires will be used to collect data on demographic, environmental, prenatal, and birth factors (Table 2). When the participants are 3, 6, 9 and 12 months of age, questionnaires will be provided to parents to collect data on diet, medications and potential environmental confounders, and to collect data for primary and secondary outcomes (Table 3).

Table 2: Baseline questionnaire data

|                        |                                                                                                                                                          |
|------------------------|----------------------------------------------------------------------------------------------------------------------------------------------------------|
| Family and demographic | Family history of allergic disease (allergy, eczema, hay fever, asthma), maternal BCG vaccination, parent education, parent country of birth, ethnicity. |
|------------------------|----------------------------------------------------------------------------------------------------------------------------------------------------------|

|                       |                                                                                                                                                |
|-----------------------|------------------------------------------------------------------------------------------------------------------------------------------------|
| Household environment | Size, composition, smoking, pets, region (post code).                                                                                          |
| Maternal prenatal     | Age, weight, height, prior pregnancies, vaccinations, smoking, antibiotics, vitamin D, probiotics other medications or supplements.            |
| Birth                 | Mode of delivery*, birth site*, plurality*, birth complications, gestational age, weight, sex, antibiotics or other medications during labour. |

\* Required for stratification prior to randomisation

Table 3: Three- and six-monthly questionnaire outcome data

|           |                                                                                                                                                                                                                                                                                                                            |
|-----------|----------------------------------------------------------------------------------------------------------------------------------------------------------------------------------------------------------------------------------------------------------------------------------------------------------------------------|
| Illnesses | Any episode of illness, infant age, duration of illness, symptoms, medial consultations and hospital admissions, diagnosis and any treatments/medications.                                                                                                                                                                 |
| Eczema    | Symptoms of eczema, infant age at onset of eczema, distribution of eczema, use of eczema medications, medical consultations and hospital admissions. Includes modified U.K. working party's diagnostic criteria for atopic dermatitis and modified patient-oriented eczema measure (POEM) tool questions. <sup>39 40</sup> |
| Allergies | Any episodes of food or other allergies, infant age, allergen, symptoms, severity, diagnosis and any treatment.                                                                                                                                                                                                            |
| Asthma    | International study of asthma and allergies in childhood (ISAAC) questions, <sup>41 42</sup> asthma medication usage, symptom severity, acute exacerbations and health care utilisation, including hospitalisations                                                                                                        |
| Diet      | Breast milk feeding, formula milk feeding, food introduction, dietary supplements.                                                                                                                                                                                                                                         |
| Other     | Household composition, childcare, pets and other animals, household smoking, drinking water source, vaccinations, other medications or supplements, other diseases/disabilities, BCG complications, overseas travel, non-illness associated hospital admissions.                                                           |

### Clinical assessments

Allergic sensitisation: Skin prick testing (SPT) to the following panel of allergens will be assessed: food allergens - cow's milk, raw egg, peanut, sesame, cashew, hazelnut, shellfish, walnut (at 5-year visit only); other allergens - *Dermatophagoides pteronyssinus 1* (house dust mite), cat, dog, *Alternaria tenuis* (mould) and rye grass pollen. SPT will be done according to standard guidelines.<sup>43</sup> For each food allergen tested, data will also be collected on prior ingestion, exposure, reactions and tolerance (after the SPT wheal size is assessed).

Eczema: Severity of eczema will be assessed using Scoring of Atopic Dermatitis (SCORAD).<sup>44</sup>

Oral food challenge (OFC): Participants with a wheal diameter  $\geq 1$  mm greater than the negative control to selected food allergens during SPT will be invited to have an OFC as detailed in supplementary Figure 1. OFCs will be done at MCRI according to Australasian Society of Clinical Immunology and Allergy (ASCIA) guidelines as used by the RCH Allergy Clinic and the HealthNuts study.<sup>45</sup> The different pathways that will occur during an OFC detailed in supplementary Figure 2.

1  
2  
3 Other: Weight, height, skin, eye and hair colour, BCG vaccination site including scar  
4 measurement and photograph. BCG vaccination site assessment will occur after all other  
5 assessments are complete.  
6

### 7 8 **Biological sample collection**

9 Full blood examination: A capillary blood sample will be collected from participants soon  
10 after birth as a preliminary screen for primary T-cell immunodeficiencies. This may be done  
11 before or after randomisation.  
12

13 Peripheral blood: Peripheral blood samples will be collected at 7 days, 7 months, 1 year and 5  
14 years of age. These samples will be used for immediate immune stimulation experiments as  
15 well as separation and storage of peripheral blood mononuclear cells and granulocytes,  
16 plasma and plasma-depleted cells at -80°C or in liquid nitrogen, as appropriate. These  
17 samples will be retained for future immunological analysis.  
18  
19

20 Stool: From the day of birth participant's parents will be requested to collect a stool sample  
21 on each day (up to seven samples) and store it in a domestic freezer until collection at the 7-  
22 day post randomisation study visit. Additional stool samples will be collected during the 7-  
23 month and 1-year study visits or by parents prior to the one-year study visit using an in-home  
24 stool collection kit provided by the study team.  
25  
26

## 27 **Outcomes**

### 28 **Primary outcomes**

29 The primary outcomes are the proportions of infants with the following measures of allergic  
30 disease and infection at 1 year and 5 years of age:  
31

- 32 • atopic sensitisation (positive SPT) to one or more of a panel of food and aeroallergens
- 33 • eczema (Williams' UK diagnostic criteria)
- 34 • lower respiratory tract infection (LRTI) episode ever (1 year) or hospitalisation ever  
35 (5 years)
- 36 • asthma (ISAAC definition) ever and current (5 years of age only)  
37  
38

### 39 **Secondary outcomes**

40 The secondary outcomes are the following additional measures of allergy and infection:  
41

#### 42 **Allergy**

43 The proportion of infants with clinical food allergy (Supplementary figures 1-2); atopic  
44 sensitisation with  $\geq 3$  mm wheal diameter to any allergen; atopic sensitisation to multiple  
45 allergens; parent report of food allergy to any food; atopic sensitisation to egg allergen;  
46 clinical egg allergy; atopic wheeze.  
47  
48

#### 49 **Eczema**

50 Severity of eczema; age of onset of eczema; and proportions of clinically diagnosed eczema  
51 and steroid use for eczema.  
52  
53

#### 54 **Infections**

55 Proportion of infants with or rate of the following: any infection; upper respiratory tract  
56 infection; LRTI; diarrhoea with vomiting; rash with fever; fever; hospitalisation for infection;  
57 hospitalisation for respiratory tract infection.  
58  
59

#### 60 **Asthma**

The proportion of infants with current asthma, asthma severity and medication use for asthma

### Sample size and power calculation

This study aims to randomise a total of 1,438 participants. This sample size is calculated based on an assumed minimum 80% retention rate, resulting in an expected minimum 1,150 infants with 1-year data available. With a final sample size of 575 in each arm, this study is powered to detect a minimum 35% reduction in atopic sensitisation, 25% reduction in eczema and 25% reduction in LRTI with a power of 80% in the first year of life and a minimum 37% reduction in atopic sensitisation, 26% reduction in eczema, 26% reduction in LRTI and 27% reduction in asthma with a power of 80% at five years of age. These differences are based on the previously reported prevalence of atopic sensitisation, eczema, LRTI and asthma in Australian infants at 1 and 5 years of age.<sup>35 36 46</sup>

### Recruitment

Recruitment will occur in two stages: (1) early consent will be sought from pregnant women attending antenatal clinics or in the postnatal ward at a study site; (2) additional pregnant women or mothers interested in participating but not being cared for at a study site may also be recruited if they contact the research team antenatally or within 10 days of delivery. Consent to participate in the study will be verbally confirmed after the birth of antenatally recruited infants and prior to randomisation.

### Randomisation

Recruited neonates will only be randomised after confirmation that they still fulfil inclusion criteria and do not meet any exclusion criteria. Randomisation to BCG-vaccination or no BCG vaccination will be done in a 1:1 ratio using the REDCap randomisation function.<sup>38</sup> The randomisation schedule will be established by a statistician external to the study using random permuted blocks with a minimum of three different block sizes. Randomisation will be stratified by: (i) site (hospital); (ii) method of delivery (Caesarean vs non-Caesarean); and (iii) plurality of birth (twins vs singletons). Twins will be assigned to the same intervention arm.

### Blinding

As BCG vaccination results in the formation of a scar at the vaccination site in 93-99% of infants,<sup>47-50</sup> blinding with the use of a placebo is not possible. For blinding of clinical assessments, prior to commencement of the 1- and 5-year study visits, each participant's left upper arm will be covered with a bandage by the parent or a member of the study team not involved with the assessment to hide the potential scar site. Clinical assessments will be done by a member of the study team or clinical staff member who was not involved in the randomisation of the participant.

### Statistical analysis

Statistical analysis of primary and secondary outcomes will be overseen by the trial statistician. Primary analysis will be by intention to treat, including all randomised participants where outcome data are available. Data will be collected according to Consolidated Standards of Reporting Trials (CONSORT) guidelines for reporting randomised trials.<sup>51</sup>

### Outcomes

#### Primary outcomes

1  
2  
3 Comparison between BCG-vaccinated and BCG-naïve infants will be estimated using binary  
4 regression adjusted for the stratification factors used during randomisation. Results will be  
5 presented as risk difference with 95% confidence intervals (CI).  
6

### 7 8 **Secondary outcomes**

9 Comparison between the BCG-vaccinated and BCG-naïve infants will be estimated using  
10 binary linear or Poisson regression adjusted for the stratification factors used during  
11 randomisation. Results will be presented as risk difference with 95% CI.  
12

### 13 14 **Missing data**

15 If the proportion of missing data is less than 5%, the primary analysis will be a complete case  
16 analysis. Otherwise, the frequency and patterns of missing data will be examined and, if  
17 appropriate, multiple imputation models will be conducted for the outcome variables. Fifty  
18 completed data sets will be imputed by chained equations including all the children initially  
19 randomised. The primary outcome, strata variable (mode of birth: vaginal/caesarean), and the  
20 variables predictive of missingness and allergy, eczema, infection or asthma will be included  
21 in the imputation model.  
22

### 23 24 **Subgroup analysis**

25 Prior to any subgroup analysis, adjusted models including the stratification factors used in  
26 randomisation, the randomisation assignment and the subgroup variable as covariates will be  
27 used to estimate the interaction between the intervention and the subgroup variable. Where  
28 these models provide evidence that the intervention varies between subgroups, specific  
29 subgroup estimates and confidence intervals will be presented obtained from the adjusted  
30 model. The subgroups are presence or absence of BCG scar; timing of BCG  
31 administration; maternal BCG vaccination; sex; mode of delivery; season of birth; timing of  
32 hepatitis B vaccination. For allergy, eczema and asthma outcomes, an additional subgroup  
33 variable, family history of allergic disease or asthma, will be assessed.  
34  
35

### 36 37 **Data monitoring and auditing**

38 The independent Data Safety and Monitoring Committee (DSMC), consisting of an  
39 independent statistician, neonatologist and paediatric infectious diseases consultant will meet  
40 to review data and participant safety 6-monthly.  
41

### 42 43 **Risks**

44 The potential risks of participation in this study may be related to: (1) adverse reactions to  
45 BCG vaccination: subcutaneous abscess, exaggerated local reaction, lymphadenitis, keloid  
46 scarring, osteitis and disseminated infection.<sup>52</sup> In Australia, adverse reactions to BCG vaccine  
47 occur in 15.3 out of 10,000 doses;<sup>53</sup> (2) blood collection: discomfort, bruising and rarely  
48 minor infection or blood clots (3) clinical assessments of allergy: anaphylactic reactions may  
49 occur during OFC, during SPT (rare) and as a late reaction to OFC (from further allergen  
50 exposures during the subsequent week). The protocols and workflows for SPT and OFC  
51 mitigate the risk of anaphylactic reactions and their safety has been demonstrated in previous  
52 clinical trials (supplementary Figures 1 and 2).<sup>45</sup> All AE will be recorded, and SAEs reported  
53 to the study site HREC and the DSMC.  
54  
55

### 56 57 **Outlook and significance**

58 The findings of MIS BAIR will provide evidence as to whether neonatal BCG vaccination, a  
59 low-cost, readily available intervention, reduces the prevalence of allergies and infections in  
60 the first one and five years of life, and asthma in the first five years of life. An immune



priming benefit of neonatal BCG against these diseases would have considerable public health implications and thus inform guidelines for BCG vaccine policies worldwide.

### Limitations

The potential limitations of MIS BAIR include the inability to blind the parent(s)/guardian(s) to the infant's randomisation assignment. This may lead to bias or lower compliance if parent(s)/guardian(s) are disappointed with the randomisation assignment. However, blinding will be done for the 13-month study clinical assessments from which several of the primary and secondary outcomes measures of allergy and eczema are obtained. We expect that there will be greater recruitment of participants with a family history of allergic disease, which may limit the generalisability of our findings. We will therefore collect data in relation to family history to enable us to consider for this in later analyses. BCG was followed by multiple administrations of non-live vaccines, and this might attenuate the beneficial non-specific effects of BCG.<sup>54 55</sup>

### ETHICS AND DISSEMINATION

This trial has been approved by the Mercy Health Human Research Ethics Committee (HREC, No. R12-28) and RCH HREC (No. 33025) with governance approval from Barwon Health and St John of God, Geelong. A record of consents and refusals will be maintained on the study REDCap database. Parent(s)/guardian(s) of participants will be informed of their option to withdraw from the study at any time. An electronic or hard copy parent /guardian information and consent form (PGICF) will be completed a parent/guardian as part of the consent process. Results of this trial will be published in peer-reviewed journals and presented at scientific conferences.

**Contributors** NC is the lead investigator and responsible for study conception, design and funding acquisition. KG developed the trial database. KG, NC, BF, SD, LC, CZ developed the ethics application and all other authors provided critical evaluation and revision. DC, KG, PV, CM, VA, NC developed the recruitment methods. KG, BF, VA, ALP, KA, PV developed and SD, MS, NC contributed to the design of the questionnaires. KG, KA developed and ALP, NC, PV contributed to the clinical assessment methods. CZ, NC, BF, SG, KF developed and KG, NM, RRB, PV contributed to biological sample collection and processing methods. SD developed the statistical analysis plan. NC, KG, KA, FS, VA, NM, MS contributed to and ALP, KF, RRB, PV, DC provided critical evaluation and revision. NM drafted the manuscript, co-ordinated manuscript preparation and revision. PZ contributed to an early draft of the manuscript. All authors provided critical evaluation and revision of the manuscript, and have approved the final version of this manuscript.

**Funding** This study is funded by research grants from the National Health and Medical Research Council (NHMRC) of Australia, The University of Melbourne, RCH foundation and MCRI.

**Disclaimer** The study funders did not have authority over the study design or preparation of this report.

**Competing Interests** All other authors have no competing interests to declare.

**Patient consent** Parent/guardian consent obtained

**Ethics approval** Mercy Health HREC and RCH HREC

**Provenance and peer review** Not commissioned; externally peer reviewed.

**Open Access** This is an open access article distributed in accordance with the Creative Commons Attribution Non Commercial (CC BY-NC 4.0) license, which permits others to distribute, remix, adapt, build upon this work non-commercially, and license their derivative works on different terms, provided the original work is properly cited, appropriate credit is given, any changes made indicated, and the use is non-commercial. See: <http://creativecommons.org/licenses/by-nc/4.0/>.

## REFERENCES

1. World Health Organization. Immunization coverage estimates by WHO region: BCG: World Health Organization; 2018 [updated 19th July 2018. Available from: <http://apps.who.int/gho/data/view.main.81500?lang=en> accessed 1st June 2019 2019.
2. Higgins JP, Soares-Weiser K, Lopez-Lopez JA, et al. Association of BCG, DTP, and measles containing vaccines with childhood mortality: systematic review. *BMJ* 2016;355:i5170. doi: 10.1136/bmj.i5170 [published Online First: 2016/10/16]
3. Pollard AJ, Finn A, Curtis N. Non-specific effects of vaccines: plausible and potentially important, but implications uncertain. *Arch Dis Child* 2017;102(11):1077-81. doi: 10.1136/archdischild-2015-310282 [published Online First: 2017/05/16]
4. Biering-Sorensen S, Aaby P, Lund N, et al. Early BCG-Denmark and Neonatal Mortality Among Infants Weighing <2500 g: A Randomized Controlled Trial. *Clin Infect Dis* 2017;65(7):1183-90. doi: 10.1093/cid/cix525 [published Online First: 2018/03/27]
5. Aaby P, Roth A, Ravn H, et al. Randomized trial of BCG vaccination at birth to low-birth-weight children: beneficial nonspecific effects in the neonatal period? *J Infect Dis* 2011;204(2):245-52. doi: 10.1093/infdis/jir240 [published Online First: 2011/06/16]
6. Freyne B, Curtis N. Does neonatal BCG vaccination prevent allergic disease in later life? *Arch Dis Child* 2014;99(2):182-4. doi: 10.1136/archdischild-2013-305655 [published Online First: 2014/01/15]
7. Arnoldussen DL, Linehan M, Sheikh A. BCG vaccination and allergy: a systematic review and meta-analysis. *J Allergy Clin Immunol* 2011;127(1):246-53, 53 e1-21. doi: 10.1016/j.jaci.2010.07.039 [published Online First: 2010/10/12]
8. Rousseau MC, Parent ME, St-Pierre Y. Potential health effects from non-specific stimulation of the immune function in early age: the example of BCG vaccination. *Pediatr Allergy Immunol* 2008;19(5):438-48. doi: 10.1111/j.1399-3038.2007.00669.x [published Online First: 2008/01/03]
9. El-Zein M, Parent ME, Benedetti A, et al. Does BCG vaccination protect against the development of childhood asthma? A systematic review and meta-analysis of epidemiological studies. *Int J Epidemiol* 2010;39(2):469-86. doi: 10.1093/ije/dyp307 [published Online First: 2009/10/14]
10. Steenhuis TJ, van Aalderen WM, Bloksma N, et al. Bacille-Calmette-Guerin vaccination and the development of allergic disease in children: a randomized, prospective, single-blind study. *Clin Exp Allergy* 2008;38(1):79-85. doi: 10.1111/j.1365-2222.2007.02859.x [published Online First: 2007/10/25]
11. Thostesen LM, Kjaergaard J, Pihl GT, et al. Neonatal BCG vaccination and atopic dermatitis before 13 months of age: A randomized clinical trial. *Allergy* 2018;73(2):498-504. doi: 10.1111/all.13314 [published Online First: 2017/09/21]
12. Asher MI, Montefort S, Bjorksten B, et al. Worldwide time trends in the prevalence of symptoms of asthma, allergic rhinoconjunctivitis, and eczema in childhood: ISAAC Phases One and Three repeat multicountry cross-sectional surveys. *Lancet* 2006;368(9537):733-43. doi: 10.1016/S0140-6736(06)69283-0 [published Online First: 2006/08/29]
13. Mullins RJ. Paediatric food allergy trends in a community-based specialist allergy practice, 1995-2006. *Med J Aust* 2007;186(12):618-21. [published Online First: 2007/06/20]
14. Sicherer SH, Munoz-Furlong A, Sampson HA. Prevalence of peanut and tree nut allergy in the United States determined by means of a random digit dial telephone survey: a 5-year follow-up study. *J Allergy Clin Immunol* 2003;112(6):1203-7. doi: 10.1016/S0091 [published Online First: 2003/12/06]
15. Gupta R, Sheikh A, Strachan D, et al. Increasing hospital admissions for systemic allergic disorders in England: analysis of national admissions data. *BMJ* 2003;327(7424):1142-3. doi: 10.1136/bmj.327.7424.1142 [published Online First: 2003/11/15]
16. Downs SH, Marks GB, Sporik R, et al. Continued increase in the prevalence of asthma and atopy. *Arch Dis Child* 2001;84(1):20-23. [published Online First: 2000/12/22]
17. Strachan DP. Hay fever, hygiene, and household size. *BMJ* 1989;299(6710):1259-60. [published Online First: 1989/11/18]
18. Netea MG, Quintin J, van der Meer JW. Trained immunity: a memory for innate host defense. *Cell Host Microbe* 2011;9(5):355-61. doi: 10.1016/j.chom.2011.04.006 [published Online First: 2011/05/18]
19. Novakovic B, Messina N, Curtis N. Chapter 6 - The Heterologous Effects of Bacillus Calmette-Guérin (BCG) Vaccine and Trained Innate Immunity. In: Faustman DL, ed. *The Value of BCG and TNF in Autoimmunity (Second Edition)*. Second edition. ed: Academic Press 2018:71-90.

20. Marchant A, Goetghebuer T, Ota MO, et al. Newborns develop a Th1-type immune response to Mycobacterium bovis bacillus Calmette-Guerin vaccination. *J Immunol* 1999;163(4):2249-55. [published Online First: 1999/08/10]
21. Kleinnijenhuis J, Quintin J, Preijers F, et al. Long-lasting effects of BCG vaccination on both heterologous Th1/Th17 responses and innate trained immunity. *J Innate Immun* 2014;6(2):152-8. doi: 10.1159/000355628 [published Online First: 2013/11/07]
22. Messina NL, Zimmermann P, Curtis N. The impact of vaccines on heterologous adaptive immunity. *Clin Microbiol Infect* 2019 doi: 10.1016/j.cmi.2019.02.016 [published Online First: 2019/02/24]
23. de Castro MJ, Pardo-Seco J, Martinon-Torres F. Nonspecific (Heterologous) Protection of Neonatal BCG Vaccination Against Hospitalization Due to Respiratory Infection and Sepsis. *Clin Infect Dis* 2015;60(11):1611-9. doi: 10.1093/cid/civ144 [published Online First: 2015/03/01]
24. Hollm-Delgado MG, Stuart EA, Black RE. Acute lower respiratory infection among Bacille Calmette-Guerin (BCG)-vaccinated children. *Pediatrics* 2014;133(1):e73-81. doi: 10.1542/peds.2013-2218 [published Online First: 2014/01/01]
25. Aaby P, Mogensen SW, Rodrigues A, et al. Evidence of Increase in Mortality After the Introduction of Diphtheria-Tetanus-Pertussis Vaccine to Children Aged 6-35 Months in Guinea-Bissau: A Time for Reflection? *Front Public Health* 2018;6:79. doi: 10.3389/fpubh.2018.00079 [published Online First: 2018/04/05]
26. Aaby P, Ravn H, Benn CS. The WHO Review of the Possible Nonspecific Effects of Diphtheria-Tetanus-Pertussis Vaccine. *Pediatr Infect Dis J* 2016;35(11):1247-57. doi: 10.1097/INF.0000000000001269 [published Online First: 2016/10/19]
27. Kjaergaard J, Birk NM, Nissen TN, et al. Nonspecific effect of BCG vaccination at birth on early childhood infections: a randomized, clinical multicenter trial. *Pediatr Res* 2016;80(5):681-85. doi: 10.1038/pr.2016.142 [published Online First: 2016/11/02]
28. Haahr S, Michelsen SW, Andersson M, et al. Non-specific effects of BCG vaccination on morbidity among children in Greenland: a population-based cohort study. *Int J Epidemiol* 2016;45(6):2122-30. doi: 10.1093/ije/dyw244 [published Online First: 2016/01/01]
29. Benn CS, Sorup S. Commentary: BCG has no beneficial non-specific effects on Greenland. An answer to the wrong question? *Int J Epidemiol* 2016;45(6):2131-33. doi: 10.1093/ije/dyw299 [published Online First: 2016/11/20]
30. World Health Organization. Global Hepatitis Report 2017. Geneva: World Health Organization, 2017:83.
31. Loh W, Tang MLK. The Epidemiology of Food Allergy in the Global Context. *Int J Environ Res Public Health* 2018;15(9) doi: 10.3390/ijerph15092043 [published Online First: 2018/09/21]
32. Peters RL, Koplin JJ, Gurrin LC, et al. The prevalence of food allergy and other allergic diseases in early childhood in a population-based study: HealthNuts age 4-year follow-up. *J Allergy Clin Immunol* 2017;140(1):145-53 e8. doi: 10.1016/j.jaci.2017.02.019 [published Online First: 2017/05/19]
33. Prescott SL, Pawankar R, Allen KJ, et al. A global survey of changing patterns of food allergy burden in children. *World Allergy Organ J* 2013;6(1):21. doi: 10.1186/1939-4551-6-21 [published Online First: 2013/12/07]
34. Martin PE, Koplin JJ, Eckert JK, et al. The prevalence and socio-demographic risk factors of clinical eczema in infancy: a population-based observational study. *Clin Exp Allergy* 2013;43(6):642-51. doi: 10.1111/cea.12092 [published Online First: 2013/05/29]
35. Osborne NJ, Koplin JJ, Martin PE, et al. Prevalence of challenge-proven IgE-mediated food allergy using population-based sampling and predetermined challenge criteria in infants. *J Allergy Clin Immunol* 2011;127(3):668-76 e1-2. doi: 10.1016/j.jaci.2011.01.039 [published Online First: 2011/03/08]
36. Australian Centre for Asthma Monitoring. Asthma in Australia 2011. AIHW Asthma Series: no 4 Cat no ACM 22. Canberra: Australian Institute of Health and Welfare, 2011.
37. The BCG vaccine: information and recommendations for use in Australia. National Tuberculosis Advisory Committee update October 2012. *Commun Dis Intell Q Rep* 2013;37(1):E65-72. [published Online First: 2013/07/12]
38. Harris PA, Taylor R, Thielke R, et al. Research electronic data capture (REDCap)--a metadata-driven methodology and workflow process for providing translational research informatics support. *J Biomed Inform* 2009;42(2):377-81. doi: 10.1016/j.jbi.2008.08.010 [published Online First: 2008/10/22]



39. Williams HC, Burney PG, Hay RJ, et al. The U.K. Working Party's Diagnostic Criteria for Atopic Dermatitis. I. Derivation of a minimum set of discriminators for atopic dermatitis. *Br J Dermatol* 1994;131(3):383-96. [published Online First: 1994/09/01]
40. Charman CR, Venn AJ, Williams HC. The patient-oriented eczema measure: development and initial validation of a new tool for measuring atopic eczema severity from the patients' perspective. *Arch Dermatol* 2004;140(12):1513-9. doi: 10.1001/archderm.140.12.1513 [published Online First: 2004/12/22]
41. Mallol J, Crane J, von Mutius E, et al. The International Study of Asthma and Allergies in Childhood (ISAAC) Phase Three: a global synthesis. *Allergol Immunopathol (Madr)* 2013;41(2):73-85. doi: 10.1016/j.aller.2012.03.001 [published Online First: 2012/07/10]
42. Beasley R, The International Study of Asthma and Allergies in Childhood (ISAAC) Steering Committee. Worldwide variation in prevalence of symptoms of asthma, allergic rhinoconjunctivitis, and atopic eczema: ISAAC. The International Study of Asthma and Allergies in Childhood (ISAAC) Steering Committee. *Lancet* 1998;351(9111):1225-32. [published Online First: 1998/06/27]
43. Australasian Society of Clinical Immunology and Allergy (ASCIA) SPTWP. Skin prick testing for the diagnosis of allergic disease: A manual for practitioners Sydney: ASCIA; 2016 [Available from: <https://allergy.org.au/hp/papers/skin-prick-testing/>].
44. Pucci N, Novembre E, Cammarata MG, et al. Scoring atopic dermatitis in infants and young children: distinctive features of the SCORAD index. *Allergy* 2005;60(1):113-6. doi: 10.1111/j.1398-9995.2004.00622.x [published Online First: 2004/12/04]
45. Osborne NJ, Koplin JJ, Martin PE, et al. The HealthNuts population-based study of paediatric food allergy: validity, safety and acceptability. *Clin Exp Allergy* 2010;40(10):1516-22. doi: 10.1111/j.1365-2222.2010.03562.x [published Online First: 2010/07/09]
46. Kusel MM, de Klerk NH, Holt PG, et al. Role of respiratory viruses in acute upper and lower respiratory tract illness in the first year of life: a birth cohort study. *Pediatr Infect Dis J* 2006;25(8):680-6. doi: 10.1097/01.inf.0000226912.88900.a3 [published Online First: 2006/07/29]
47. Anderson EJ, Webb EL, Mawa PA, et al. The influence of BCG vaccine strain on mycobacteria-specific and non-specific immune responses in a prospective cohort of infants in Uganda. *Vaccine* 2012;30(12):2083-9. doi: 10.1016/j.vaccine.2012.01.053 [published Online First: 2012/02/04]
48. Birk NM, Nissen TN, Ladekarl M, et al. The association between Bacillus Calmette-Guerin vaccination (1331 SSI) skin reaction and subsequent scar development in infants. *BMC Infect Dis* 2017;17(1):540. doi: 10.1186/s12879-017-2641-0 [published Online First: 2017/08/05]
49. Frankel H, Byberg S, Bjerregaard-Andersen M, et al. Different effects of BCG strains - A natural experiment evaluating the impact of the Danish and the Russian BCG strains on morbidity and scar formation in Guinea-Bissau. *Vaccine* 2016;34(38):4586-93. doi: 10.1016/j.vaccine.2016.07.022 [published Online First: 2016/08/06]
50. Funch KM, Thysen SM, Rodrigues A, et al. Determinants of BCG scarification among children in rural Guinea-Bissau: A prospective cohort study. *Hum Vaccin Immunother* 2018;14(10):2434-42. doi: 10.1080/21645515.2017.1421879 [published Online First: 2018/01/03]
51. Turner L, Shamseer L, Altman DG, et al. Consolidated standards of reporting trials (CONSORT) and the completeness of reporting of randomised controlled trials (RCTs) published in medical journals. *Cochrane Database Syst Rev* 2012;11:MR000030. doi: 10.1002/14651858.MR000030.pub2 [published Online First: 2012/11/16]
52. World Health Organization. BCG vaccine: WHO position paper - February 2018 Weekly epidemiological record. Switzerland: World Health, Organization, 2018:73-96.
53. Hendry AJ, Dey A, Beard FH, et al. Adverse events following immunisation with bacille Calmette-Guerin vaccination: baseline data to inform monitoring in Australia following introduction of new unregistered BCG vaccine. *Commun Dis Intell Q Rep* 2016;40(4):E470-E74. [published Online First: 2017/01/04]
54. Aaby P, Kollmann TR, Benn CS. Nonspecific effects of neonatal and infant vaccination: public-health, immunological and conceptual challenges. *Nat Immunol* 2014;15(10):895-9. doi: 10.1038/ni.2961 [published Online First: 2014/09/19]
55. Shann F. BCG vaccination in developing countries. *BMJ* 2010;340:c809. doi: 10.1136/bmj.c809 [published Online First: 2010/03/17]

1  
2  
3 **Study protocol for the Melbourne Infant Study: BCG for Allergy and Infection**  
4 **Reduction (MIS BAIR), a randomised controlled trial to determine the non-**  
5 **specific effects of neonatal BCG vaccination in a low-mortality setting**  
6  
7  
8

9 \*NL Messina, \*K Gardiner, S Donath, K Flanagan, AL Ponsonby, F Shann, R  
10 Robins-Browne, B Freyne, V Abruzzo, C Morison, L Cox, S Germano, C Zufferey, P  
11 Zimmermann, KJ Allen, P Vuillermin, M South, D Casalaz, N Curtis  
12  
13  
14

15 **Supplementary Figures**  
16  
17  
18  
19  
20  
21  
22  
23  
24  
25  
26  
27  
28  
29  
30  
31  
32  
33  
34  
35  
36  
37  
38  
39  
40  
41  
42  
43  
44  
45  
46  
47  
48  
49  
50  
51  
52  
53  
54  
55  
56  
57  
58  
59  
60

For peer review only

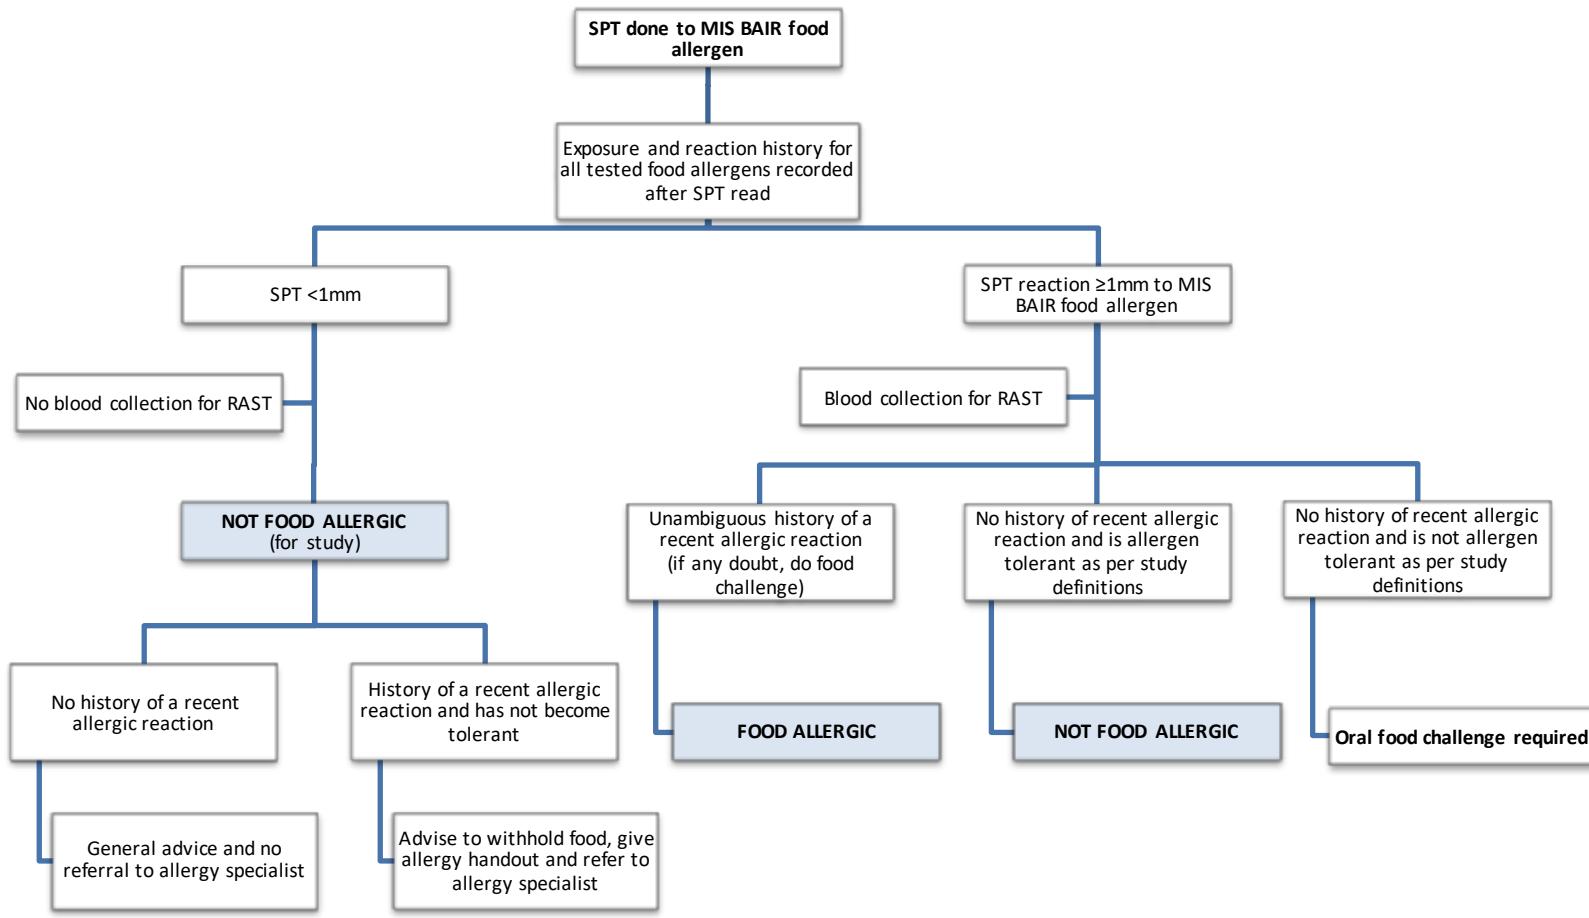

**Total dose of allergen as per food challenge protocol**

- Cows milk: 160 ml
- Raw egg white: 1x 60 g egg
- Sesame: 2 teaspoons
- Peanut: 2 teaspoons
- Cashew: 2 teaspoons
- Hazelnut: 2 teaspoons
- Shellfish: 1 peeled prawn (~15 g)

**Definitions**

**History of a recent allergic reaction:** In the past 1-2 months (1 month for egg or milk, 2 months for any other allergen), at least one of the following reactions within 30 minutes of exposure to the MIS BAIR food allergen: ≥3 non-contact concurrent hives lasting ≥5 mins, vomiting (not gagging), facial angioedema, wheeze or stridor, respiratory distress, cardiovascular compromise (pale and floppy infant, cardiac arrest).

**Allergen tolerance:** In the past 1-2 months (1 month for egg or milk, 2 months for any other allergen), infant has eaten equivalent to ≥ 'total dose of food challenge protocol' of allergen on 2 separate occasions without reaction.

**Adequate exposure:** Food eaten not just touched and food in form that is recognizable (e.g. not mixed nuts) unless infant has previously tolerated all the other food in the dish.

Supplementary Figure 1: MIS BAIR skin prick test flow chart  
 SPT skin prick test, RAST radioallergosorbent test

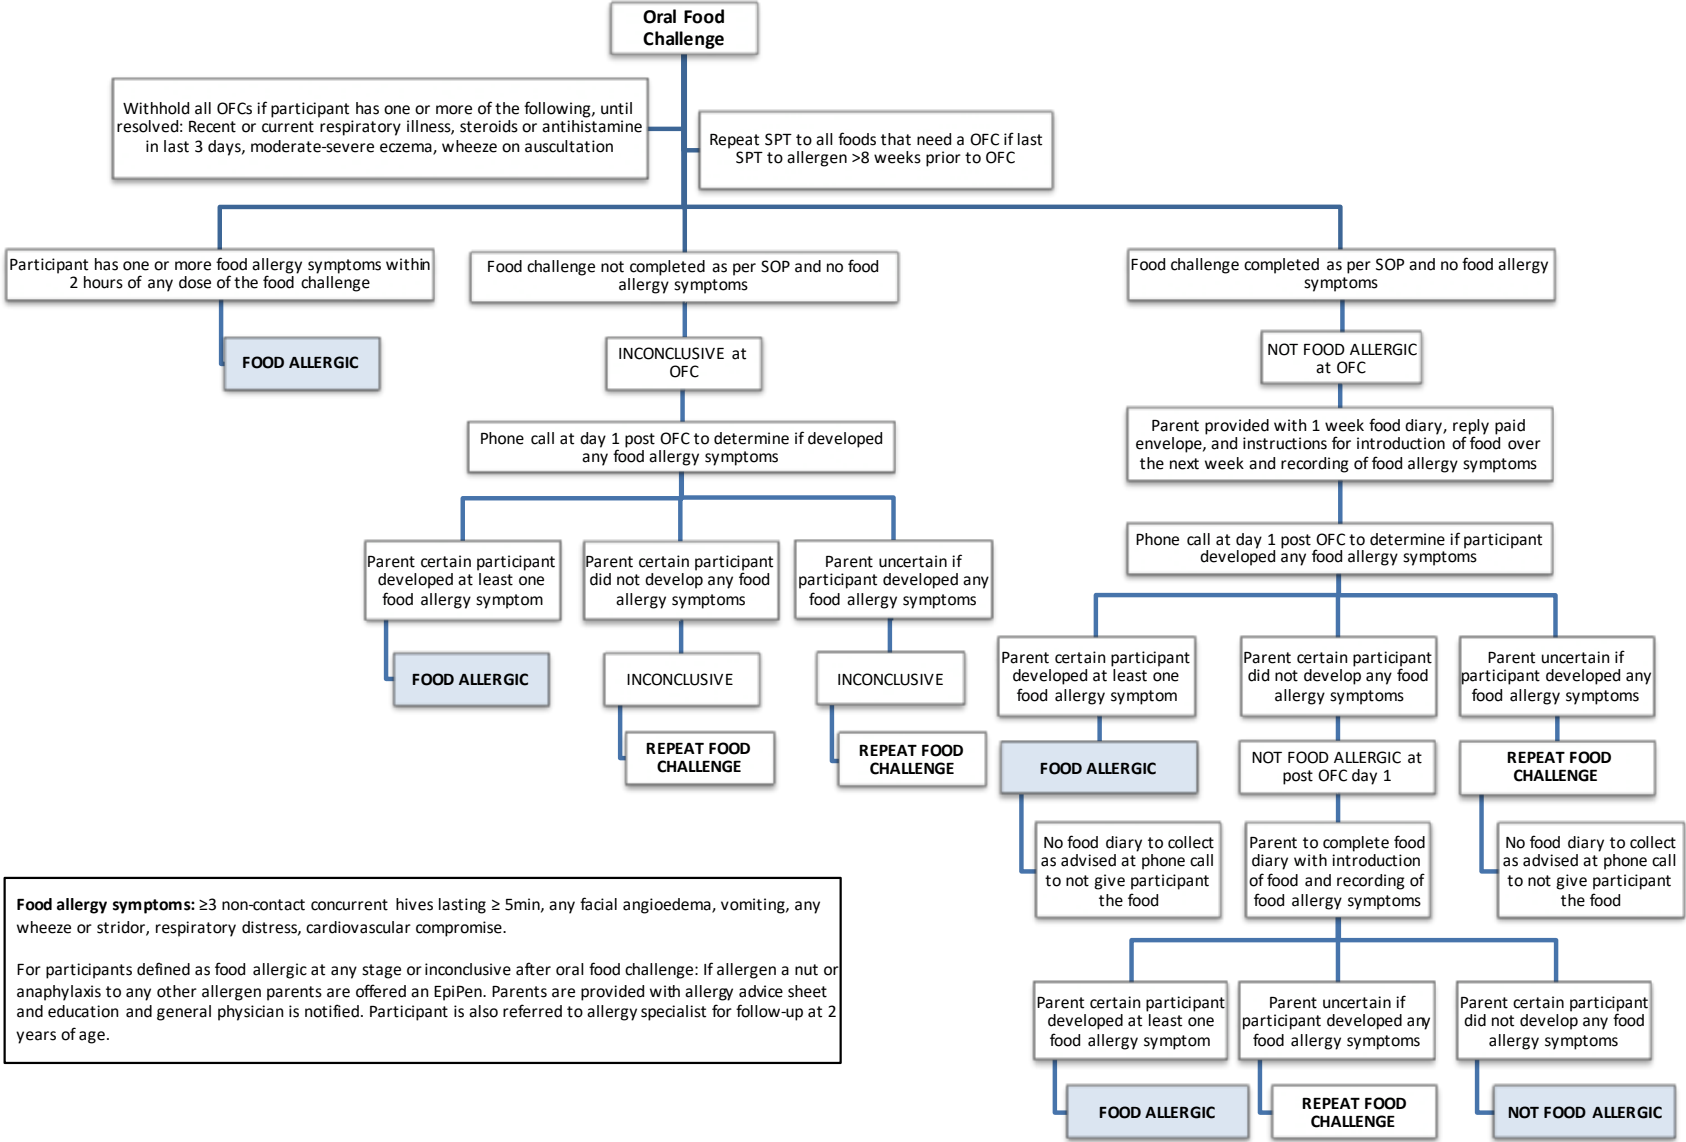

Supplementary Figure 2: MIS BAIR oral food challenge flow chart  
 OFC oral food challenge, SPT skin prick test, SOP standard operating procedure

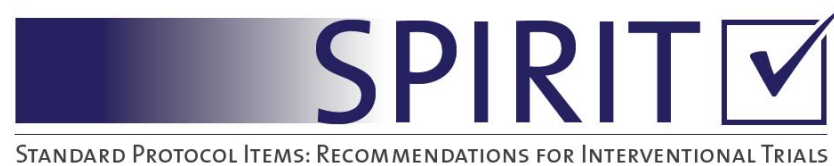

SPIRIT 2013 Checklist: Recommended items to address in a clinical trial protocol and related documents\*

| Section/item                      | Item No | Description                                                                                                                                                                                                                                                                              | Addressed on page number            |
|-----------------------------------|---------|------------------------------------------------------------------------------------------------------------------------------------------------------------------------------------------------------------------------------------------------------------------------------------------|-------------------------------------|
| <b>Administrative information</b> |         |                                                                                                                                                                                                                                                                                          |                                     |
| Title                             | 1       | Descriptive title identifying the study design, population, interventions, and, if applicable, trial acronym                                                                                                                                                                             | _____1_____                         |
| Trial registration                | 2a      | Trial identifier and registry name. If not yet registered, name of intended registry                                                                                                                                                                                                     | _____2 & 4_____                     |
|                                   | 2b      | All items from the World Health Organization Trial Registration Data Set                                                                                                                                                                                                                 | Available at<br>Clinical trials.gov |
| Protocol version                  | 3       | Date and version identifier                                                                                                                                                                                                                                                              | Approved HREC<br>application        |
| Funding                           | 4       | Sources and types of financial, material, and other support                                                                                                                                                                                                                              | _____11_____                        |
| Roles and responsibilities        | 5a      | Names, affiliations, and roles of protocol contributors                                                                                                                                                                                                                                  | _____1 & 11_____                    |
|                                   | 5b      | Name and contact information for the trial sponsor                                                                                                                                                                                                                                       | _____1_____                         |
|                                   | 5c      | Role of study sponsor and funders, if any, in study design; collection, management, analysis, and interpretation of data; writing of the report; and the decision to submit the report for publication, including whether they will have ultimate authority over any of these activities | _____11_____                        |

|    |                                                           |     |                                                                                                                                                                                                                                                                  |              |
|----|-----------------------------------------------------------|-----|------------------------------------------------------------------------------------------------------------------------------------------------------------------------------------------------------------------------------------------------------------------|--------------|
| 1  |                                                           | 5d  | Composition, roles, and responsibilities of the coordinating centre, steering committee, endpoint adjudication committee, data management team, and other individuals or groups overseeing the trial, if applicable (see Item 21a for data monitoring committee) | _____11_____ |
| 2  |                                                           |     |                                                                                                                                                                                                                                                                  |              |
| 3  |                                                           |     |                                                                                                                                                                                                                                                                  |              |
| 4  |                                                           |     |                                                                                                                                                                                                                                                                  |              |
| 5  |                                                           |     |                                                                                                                                                                                                                                                                  |              |
| 6  |                                                           |     |                                                                                                                                                                                                                                                                  |              |
| 7  |                                                           |     |                                                                                                                                                                                                                                                                  |              |
| 8  |                                                           |     |                                                                                                                                                                                                                                                                  |              |
| 9  | <b>Introduction</b>                                       |     |                                                                                                                                                                                                                                                                  |              |
| 10 |                                                           |     |                                                                                                                                                                                                                                                                  |              |
| 11 | Background and                                            | 6a  | Description of research question and justification for undertaking the trial, including summary of relevant studies (published and unpublished) examining benefits and harms for each intervention                                                               | _____3_____  |
| 12 | rationale                                                 |     |                                                                                                                                                                                                                                                                  |              |
| 13 |                                                           |     |                                                                                                                                                                                                                                                                  |              |
| 14 |                                                           | 6b  | Explanation for choice of comparators                                                                                                                                                                                                                            | _____3_____  |
| 15 |                                                           |     |                                                                                                                                                                                                                                                                  |              |
| 16 | Objectives                                                | 7   | Specific objectives or hypotheses                                                                                                                                                                                                                                | _____4_____  |
| 17 |                                                           |     |                                                                                                                                                                                                                                                                  |              |
| 18 | Trial design                                              | 8   | Description of trial design including type of trial (eg, parallel group, crossover, factorial, single group), allocation ratio, and framework (eg, superiority, equivalence, noninferiority, exploratory)                                                        | _____4_____  |
| 19 |                                                           |     |                                                                                                                                                                                                                                                                  |              |
| 20 |                                                           |     |                                                                                                                                                                                                                                                                  |              |
| 21 |                                                           |     |                                                                                                                                                                                                                                                                  |              |
| 22 | <b>Methods: Participants, interventions, and outcomes</b> |     |                                                                                                                                                                                                                                                                  |              |
| 23 |                                                           |     |                                                                                                                                                                                                                                                                  |              |
| 24 | Study setting                                             | 9   | Description of study settings (eg, community clinic, academic hospital) and list of countries where data will be collected. Reference to where list of study sites can be obtained                                                                               | _____4_____  |
| 25 |                                                           |     |                                                                                                                                                                                                                                                                  |              |
| 26 |                                                           |     |                                                                                                                                                                                                                                                                  |              |
| 27 | Eligibility criteria                                      | 10  | Inclusion and exclusion criteria for participants. If applicable, eligibility criteria for study centres and individuals who will perform the interventions (eg, surgeons, psychotherapists)                                                                     | _____4_____  |
| 28 |                                                           |     |                                                                                                                                                                                                                                                                  |              |
| 29 |                                                           |     |                                                                                                                                                                                                                                                                  |              |
| 30 | Interventions                                             | 11a | Interventions for each group with sufficient detail to allow replication, including how and when they will be administered                                                                                                                                       | _____5_____  |
| 31 |                                                           |     |                                                                                                                                                                                                                                                                  |              |
| 32 |                                                           | 11b | Criteria for discontinuing or modifying allocated interventions for a given trial participant (eg, drug dose change in response to harms, participant request, or improving/worsening disease)                                                                   | _____NA_____ |
| 33 |                                                           |     |                                                                                                                                                                                                                                                                  |              |
| 34 |                                                           | 11c | Strategies to improve adherence to intervention protocols, and any procedures for monitoring adherence (eg, drug tablet return, laboratory tests)                                                                                                                | _____5_____  |
| 35 |                                                           |     |                                                                                                                                                                                                                                                                  |              |
| 36 |                                                           |     |                                                                                                                                                                                                                                                                  |              |
| 37 |                                                           | 11d | Relevant concomitant care and interventions that are permitted or prohibited during the trial                                                                                                                                                                    | _____NA_____ |
| 38 |                                                           |     |                                                                                                                                                                                                                                                                  |              |
| 39 |                                                           |     |                                                                                                                                                                                                                                                                  |              |
| 40 |                                                           |     |                                                                                                                                                                                                                                                                  |              |
| 41 |                                                           |     |                                                                                                                                                                                                                                                                  |              |
| 42 |                                                           |     |                                                                                                                                                                                                                                                                  |              |
| 43 |                                                           |     |                                                                                                                                                                                                                                                                  |              |
| 44 |                                                           |     |                                                                                                                                                                                                                                                                  |              |
| 45 |                                                           |     |                                                                                                                                                                                                                                                                  |              |
| 46 |                                                           |     |                                                                                                                                                                                                                                                                  |              |

|    |                      |    |                                                                                                                                                                                                                                                                                                                                                                                |           |
|----|----------------------|----|--------------------------------------------------------------------------------------------------------------------------------------------------------------------------------------------------------------------------------------------------------------------------------------------------------------------------------------------------------------------------------|-----------|
| 1  | Outcomes             | 12 | Primary, secondary, and other outcomes, including the specific measurement variable (eg, systolic blood pressure), analysis metric (eg, change from baseline, final value, time to event), method of aggregation (eg, median, proportion), and time point for each outcome. Explanation of the clinical relevance of chosen efficacy and harm outcomes is strongly recommended | ___7-8___ |
| 2  |                      |    |                                                                                                                                                                                                                                                                                                                                                                                |           |
| 3  |                      |    |                                                                                                                                                                                                                                                                                                                                                                                |           |
| 4  |                      |    |                                                                                                                                                                                                                                                                                                                                                                                |           |
| 5  |                      |    |                                                                                                                                                                                                                                                                                                                                                                                |           |
| 6  | Participant timeline | 13 | Time schedule of enrolment, interventions (including any run-ins and washouts), assessments, and visits for participants. A schematic diagram is highly recommended (see Figure)                                                                                                                                                                                               | ___5___   |
| 7  |                      |    |                                                                                                                                                                                                                                                                                                                                                                                |           |
| 8  |                      |    |                                                                                                                                                                                                                                                                                                                                                                                |           |
| 9  | Sample size          | 14 | Estimated number of participants needed to achieve study objectives and how it was determined, including clinical and statistical assumptions supporting any sample size calculations                                                                                                                                                                                          | ___8___   |
| 10 |                      |    |                                                                                                                                                                                                                                                                                                                                                                                |           |
| 11 |                      |    |                                                                                                                                                                                                                                                                                                                                                                                |           |
| 12 |                      |    |                                                                                                                                                                                                                                                                                                                                                                                |           |
| 13 | Recruitment          | 15 | Strategies for achieving adequate participant enrolment to reach target sample size                                                                                                                                                                                                                                                                                            | ___8___   |
| 14 |                      |    |                                                                                                                                                                                                                                                                                                                                                                                |           |

### Methods: Assignment of interventions (for controlled trials)

#### Allocation:

|    |                                  |     |                                                                                                                                                                                                                                                                                                                                                          |         |
|----|----------------------------------|-----|----------------------------------------------------------------------------------------------------------------------------------------------------------------------------------------------------------------------------------------------------------------------------------------------------------------------------------------------------------|---------|
| 19 | Sequence generation              | 16a | Method of generating the allocation sequence (eg, computer-generated random numbers), and list of any factors for stratification. To reduce predictability of a random sequence, details of any planned restriction (eg, blocking) should be provided in a separate document that is unavailable to those who enrol participants or assign interventions | ___8___ |
| 20 |                                  |     |                                                                                                                                                                                                                                                                                                                                                          |         |
| 21 |                                  |     |                                                                                                                                                                                                                                                                                                                                                          |         |
| 22 |                                  |     |                                                                                                                                                                                                                                                                                                                                                          |         |
| 23 |                                  |     |                                                                                                                                                                                                                                                                                                                                                          |         |
| 24 |                                  |     |                                                                                                                                                                                                                                                                                                                                                          |         |
| 25 | Allocation concealment mechanism | 16b | Mechanism of implementing the allocation sequence (eg, central telephone; sequentially numbered, opaque, sealed envelopes), describing any steps to conceal the sequence until interventions are assigned                                                                                                                                                | ___8___ |
| 26 |                                  |     |                                                                                                                                                                                                                                                                                                                                                          |         |
| 27 |                                  |     |                                                                                                                                                                                                                                                                                                                                                          |         |
| 28 |                                  |     |                                                                                                                                                                                                                                                                                                                                                          |         |
| 29 | Implementation                   | 16c | Who will generate the allocation sequence, who will enrol participants, and who will assign participants to interventions                                                                                                                                                                                                                                | ___8___ |
| 30 |                                  |     |                                                                                                                                                                                                                                                                                                                                                          |         |
| 31 |                                  |     |                                                                                                                                                                                                                                                                                                                                                          |         |
| 32 |                                  |     |                                                                                                                                                                                                                                                                                                                                                          |         |
| 33 | Blinding (masking)               | 17a | Who will be blinded after assignment to interventions (eg, trial participants, care providers, outcome assessors, data analysts), and how                                                                                                                                                                                                                | ___9___ |
| 34 |                                  |     |                                                                                                                                                                                                                                                                                                                                                          |         |
| 35 |                                  |     |                                                                                                                                                                                                                                                                                                                                                          |         |
| 36 |                                  | 17b | If blinded, circumstances under which unblinding is permissible, and procedure for revealing a participant's allocated intervention during the trial                                                                                                                                                                                                     | ___9___ |
| 37 |                                  |     |                                                                                                                                                                                                                                                                                                                                                          |         |
| 38 |                                  |     |                                                                                                                                                                                                                                                                                                                                                          |         |
| 39 |                                  |     |                                                                                                                                                                                                                                                                                                                                                          |         |

### Methods: Data collection, management, and analysis

|    |                            |     |                                                                                                               |               |
|----|----------------------------|-----|---------------------------------------------------------------------------------------------------------------|---------------|
| 1  | Data collection            | 18a | Plans for assessment and collection of outcome, baseline, and other trial data, including any related         | ___5-7___     |
| 2  | methods                    |     | processes to promote data quality (eg, duplicate measurements, training of assessors) and a description of    |               |
| 3  |                            |     | study instruments (eg, questionnaires, laboratory tests) along with their reliability and validity, if known. |               |
| 4  |                            |     | Reference to where data collection forms can be found, if not in the protocol                                 |               |
| 5  |                            |     |                                                                                                               |               |
| 6  |                            | 18b | Plans to promote participant retention and complete follow-up, including list of any outcome data to be       | ___9___       |
| 7  |                            |     | collected for participants who discontinue or deviate from intervention protocols                             |               |
| 8  |                            |     |                                                                                                               |               |
| 9  | Data management            | 19  | Plans for data entry, coding, security, and storage, including any related processes to promote data quality  | Approved HREC |
| 10 |                            |     | (eg, double data entry; range checks for data values). Reference to where details of data management          | application   |
| 11 |                            |     | procedures can be found, if not in the protocol                                                               |               |
| 12 |                            |     |                                                                                                               |               |
| 13 |                            |     |                                                                                                               |               |
| 14 | Statistical methods        | 20a | Statistical methods for analysing primary and secondary outcomes. Reference to where other details of the     | 9 & clinical  |
| 15 |                            |     | statistical analysis plan can be found, if not in the protocol                                                | trials.gov    |
| 16 |                            |     |                                                                                                               |               |
| 17 |                            | 20b | Methods for any additional analyses (eg, subgroup and adjusted analyses)                                      | ___9___       |
| 18 |                            |     |                                                                                                               |               |
| 19 |                            | 20c | Definition of analysis population relating to protocol non-adherence (eg, as randomised analysis), and any    |               |
| 20 |                            |     | statistical methods to handle missing data (eg, multiple imputation)                                          | ___9___       |
| 21 |                            |     |                                                                                                               |               |
| 22 |                            |     |                                                                                                               |               |
| 23 | <b>Methods: Monitoring</b> |     |                                                                                                               |               |
| 24 |                            |     |                                                                                                               |               |
| 25 | Data monitoring            | 21a | Composition of data monitoring committee (DMC); summary of its role and reporting structure; statement of     | ___10___      |
| 26 |                            |     | whether it is independent from the sponsor and competing interests; and reference to where further details    |               |
| 27 |                            |     | about its charter can be found, if not in the protocol. Alternatively, an explanation of why a DMC is not     |               |
| 28 |                            |     | needed                                                                                                        |               |
| 29 |                            |     |                                                                                                               |               |
| 30 |                            |     |                                                                                                               |               |
| 31 |                            | 21b | Description of any interim analyses and stopping guidelines, including who will have access to these interim  | ___NA___      |
| 32 |                            |     | results and make the final decision to terminate the trial                                                    |               |
| 33 |                            |     |                                                                                                               |               |
| 34 | Harms                      | 22  | Plans for collecting, assessing, reporting, and managing solicited and spontaneously reported adverse         | ___10___      |
| 35 |                            |     | events and other unintended effects of trial interventions or trial conduct                                   |               |
| 36 |                            |     |                                                                                                               |               |
| 37 | Auditing                   | 23  | Frequency and procedures for auditing trial conduct, if any, and whether the process will be independent      | ___10___      |
| 38 |                            |     | from investigators and the sponsor                                                                            |               |
| 39 |                            |     |                                                                                                               |               |
| 40 |                            |     |                                                                                                               |               |

**Ethics and dissemination**



|    |                               |     |                                                                                                                                                                                                                                                                                     |                               |
|----|-------------------------------|-----|-------------------------------------------------------------------------------------------------------------------------------------------------------------------------------------------------------------------------------------------------------------------------------------|-------------------------------|
| 1  | Research ethics approval      | 24  | Plans for seeking research ethics committee/institutional review board (REC/IRB) approval                                                                                                                                                                                           | ___10___                      |
| 2  |                               |     |                                                                                                                                                                                                                                                                                     |                               |
| 3  |                               |     |                                                                                                                                                                                                                                                                                     |                               |
| 4  | Protocol amendments           | 25  | Plans for communicating important protocol modifications (eg, changes to eligibility criteria, outcomes, analyses) to relevant parties (eg, investigators, REC/IRBs, trial participants, trial registries, journals, regulators)                                                    | ___NA___                      |
| 5  |                               |     |                                                                                                                                                                                                                                                                                     |                               |
| 6  |                               |     |                                                                                                                                                                                                                                                                                     |                               |
| 7  |                               |     |                                                                                                                                                                                                                                                                                     |                               |
| 8  | Consent or assent             | 26a | Who will obtain informed consent or assent from potential trial participants or authorised surrogates, and how (see Item 32)                                                                                                                                                        | Approved HREC application     |
| 9  |                               |     |                                                                                                                                                                                                                                                                                     |                               |
| 10 |                               |     |                                                                                                                                                                                                                                                                                     |                               |
| 11 |                               | 26b | Additional consent provisions for collection and use of participant data and biological specimens in ancillary studies, if applicable                                                                                                                                               | Approved HREC application     |
| 12 |                               |     |                                                                                                                                                                                                                                                                                     |                               |
| 13 |                               |     |                                                                                                                                                                                                                                                                                     |                               |
| 14 | Confidentiality               | 27  | How personal information about potential and enrolled participants will be collected, shared, and maintained in order to protect confidentiality before, during, and after the trial                                                                                                | 5 & Approved HREC application |
| 15 |                               |     |                                                                                                                                                                                                                                                                                     |                               |
| 16 |                               |     |                                                                                                                                                                                                                                                                                     |                               |
| 17 |                               |     |                                                                                                                                                                                                                                                                                     |                               |
| 18 | Declaration of interests      | 28  | Financial and other competing interests for principal investigators for the overall trial and each study site                                                                                                                                                                       | ___11___                      |
| 19 |                               |     |                                                                                                                                                                                                                                                                                     |                               |
| 20 |                               |     |                                                                                                                                                                                                                                                                                     |                               |
| 21 | Access to data                | 29  | Statement of who will have access to the final trial dataset, and disclosure of contractual agreements that limit such access for investigators                                                                                                                                     | Approved HREC application     |
| 22 |                               |     |                                                                                                                                                                                                                                                                                     |                               |
| 23 |                               |     |                                                                                                                                                                                                                                                                                     |                               |
| 24 | Ancillary and post-trial care | 30  | Provisions, if any, for ancillary and post-trial care, and for compensation to those who suffer harm from trial participation                                                                                                                                                       | Approved HREC application     |
| 25 |                               |     |                                                                                                                                                                                                                                                                                     |                               |
| 26 |                               |     |                                                                                                                                                                                                                                                                                     |                               |
| 27 | Dissemination policy          | 31a | Plans for investigators and sponsor to communicate trial results to participants, healthcare professionals, the public, and other relevant groups (eg, via publication, reporting in results databases, or other data sharing arrangements), including any publication restrictions | ___11___                      |
| 28 |                               |     |                                                                                                                                                                                                                                                                                     |                               |
| 29 |                               | 31b | Authorship eligibility guidelines and any intended use of professional writers                                                                                                                                                                                                      | ___NA___                      |
| 30 |                               |     |                                                                                                                                                                                                                                                                                     |                               |
| 31 |                               | 31c | Plans, if any, for granting public access to the full protocol, participant-level dataset, and statistical code                                                                                                                                                                     | ___NA___                      |
| 32 |                               |     |                                                                                                                                                                                                                                                                                     |                               |
| 33 |                               |     |                                                                                                                                                                                                                                                                                     |                               |
| 34 |                               |     |                                                                                                                                                                                                                                                                                     |                               |
| 35 |                               |     |                                                                                                                                                                                                                                                                                     |                               |
| 36 | <b>Appendices</b>             |     |                                                                                                                                                                                                                                                                                     |                               |
| 37 |                               |     |                                                                                                                                                                                                                                                                                     |                               |
| 38 | Informed consent materials    | 32  | Model consent form and other related documentation given to participants and authorised surrogates                                                                                                                                                                                  | Approved HREC application     |
| 39 |                               |     |                                                                                                                                                                                                                                                                                     |                               |
| 40 |                               |     |                                                                                                                                                                                                                                                                                     |                               |
| 41 |                               |     |                                                                                                                                                                                                                                                                                     |                               |
| 42 |                               |     |                                                                                                                                                                                                                                                                                     |                               |
| 43 |                               |     |                                                                                                                                                                                                                                                                                     |                               |
| 44 |                               |     |                                                                                                                                                                                                                                                                                     |                               |
| 45 |                               |     |                                                                                                                                                                                                                                                                                     |                               |
| 46 |                               |     |                                                                                                                                                                                                                                                                                     |                               |

|                                     |    |                                                                                                                                                                                                |                               |
|-------------------------------------|----|------------------------------------------------------------------------------------------------------------------------------------------------------------------------------------------------|-------------------------------|
| 1<br>2<br>3<br>Biological specimens | 33 | Plans for collection, laboratory evaluation, and storage of biological specimens for genetic or molecular analysis in the current trial and for future use in ancillary studies, if applicable | 7 & Approved HREC application |
|-------------------------------------|----|------------------------------------------------------------------------------------------------------------------------------------------------------------------------------------------------|-------------------------------|

4 \*It is strongly recommended that this checklist be read in conjunction with the SPIRIT 2013 Explanation & Elaboration for important clarification on the items.  
5 Amendments to the protocol should be tracked and dated. The SPIRIT checklist is copyrighted by the SPIRIT Group under the Creative Commons  
6 [“Attribution-NonCommercial-NoDerivs 3.0 Unported”](#) license.  
7  
8  
9  
10  
11  
12  
13  
14  
15  
16  
17  
18  
19  
20  
21  
22  
23  
24  
25  
26  
27  
28  
29  
30  
31  
32  
33  
34  
35  
36  
37  
38  
39  
40  
41  
42  
43  
44  
45  
46

For peer review only
