# Supplementary material for: Study protocol for the Melbourne Infant Study: BCG for Allergy and Infection Reduction (MIS BAIR), a randomised controlled trial to determine the non-specific effects of neonatal BCG vaccination in a low-mortality setting
Source: PubMed Central journal article supplement — BMJ Open. 2019 Dec 15;9(12):e032844. doi: 10.1136/bmjopen-2019-032844 (PMC6924750; doi:10.1136/bmjopen-2019-032844), 2019-12-15
Supplement: bmjopen-2019-032844supp001.pdf [file bmjopen-2019-032844supp001.pdf]

**Study protocol for the Melbourne Infant Study: BCG for Allergy and Infection Reduction (MIS BAIR), a randomised controlled trial to determine the non-specific effects of neonatal BCG vaccination in a low-mortality setting**

\*NL Messina, \*K Gardiner, S Donath, K Flanagan, AL Ponsonby, F Shann, R Robins-Browne, B Freyne, V Abruzzo, C Morison, L Cox, S Germano, C Zufferey, P Zimmermann, KJ Allen, P Vuillermin, M South, D Casalaz, N Curtis

**Supplementary Figures**

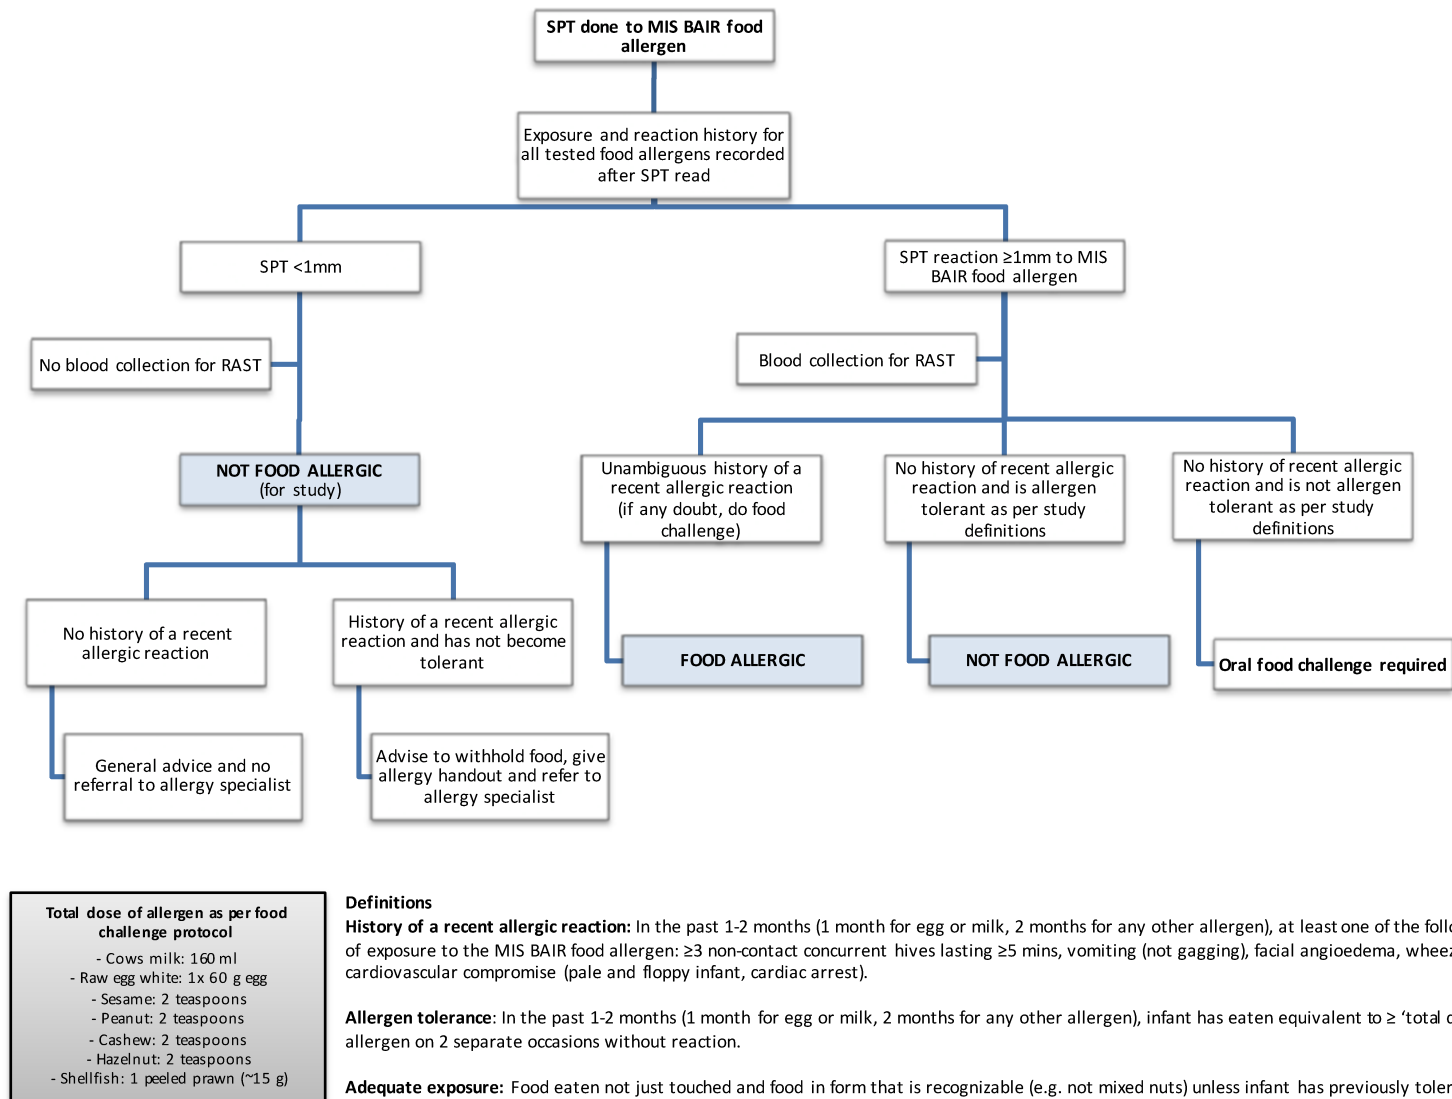

Supplementary Figure 1: MIS BAIR skin prick test flow chart  
SPT skin prick test, RAST radioallergosorbent test

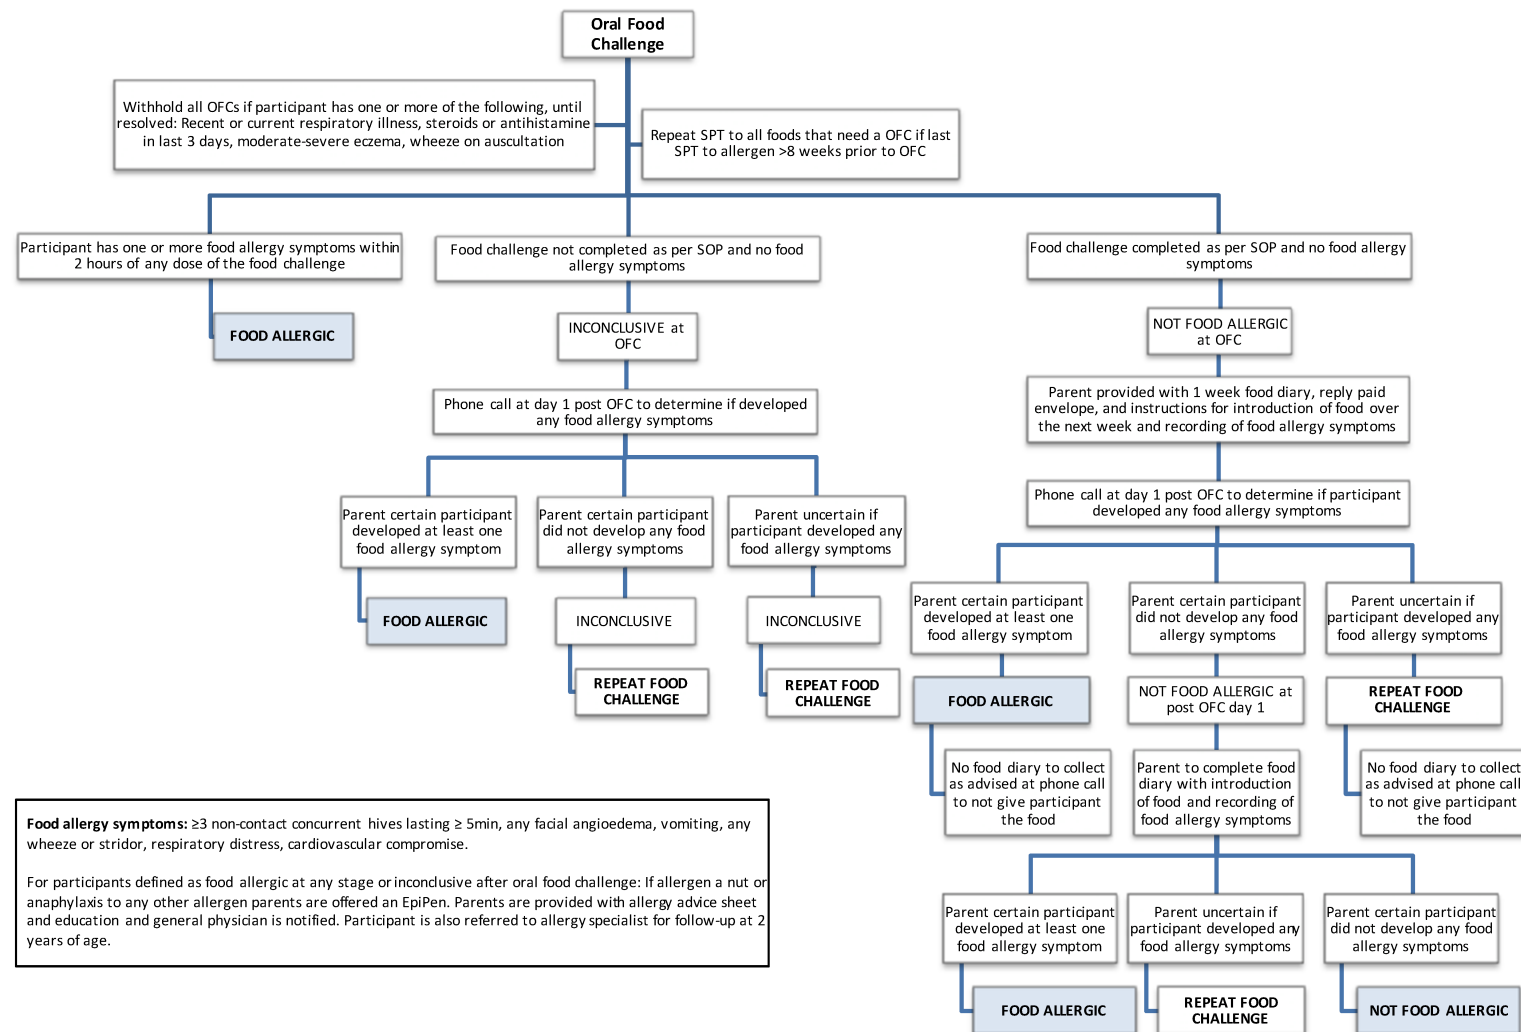

Supplementary Figure 2: MIS BAIR oral food challenge flow chart

OFC oral food challenge, SPT skin prick test, SOP standard operating procedure
